# Supplementary material
Source: publisher figshare collection journal article supplement (https://frontiersin.figshare.com/ndownloader/files/26088749)
Supplement: Supplementary file 1 [file 26088749]

Supplementary Material

# Supplementary Material A

Posterior distributions of all MixSIAR model runs and individual Bhattacharyya’s coefficients for pairwise comparisons within and between model runs. The supplementary material contains the following objects:

**Supplementary Figure A1.** MixSIAR results (species: *L. balthica*; preservation method: dried; OM source data: A; mathematical correction: none). Bhattacharyya’s coefficients for pairwise comparisons within the model run.

**Supplementary Figure A2.** MixSIAR results (species: *L. balthica*; preservation method: frozen; OM source data: A; mathematical correction: none). Bhattacharyya’s coefficients for pairwise comparisons within the model run.

**Supplementary Figure A3.** MixSIAR results (species: *L. balthica*; preservation method: formalin; OM source data: A; mathematical correction: none). Bhattacharyya’s coefficients for pairwise comparisons within the model run.

**Supplementary Figure A4.** MixSIAR results (species: *L. balthica*; preservation method: formalin; OM source data: A; mathematical correction: formalin correction). Bhattacharyya’s coefficients for pairwise comparisons within the model run and for in between model comparison.

**Supplementary Figure A5.** MixSIAR results (species: *L. balthica*; preservation method: dried; OM source data: A; mathematical correction: lipid normalization). Bhattacharyya’s coefficients for pairwise comparisons with not normalized and lipid removed MixSIAR results.

**Supplementary Figure A6.** MixSIAR results (species: *L. balthica*; preservation method: frozen; OM source data: A; mathematical correction: lipid normalization). Bhattacharyya’s coefficients for pairwise comparisons with not normalized and lipid removed MixSIAR results.

**Supplementary Figure A7.** MixSIAR results (species: *L. balthica*; preservation method: formalin; OM source data: A; mathematical correction: lipid normalization). Bhattacharyya’s coefficients for pairwise comparisons with not normalized and lipid removed MixSIAR results.

**Supplementary Figure A8.** MixSIAR results (species: *L. balthica*; preservation method: dried; OM source data: B; mathematical correction: none). Bhattacharyya’s coefficients for pairwise comparisons within the model run.

**Supplementary Figure A9.** MixSIAR results (species: *L. balthica*; preservation method: frozen; OM source data: B; mathematical correction: none). Bhattacharyya’s coefficients for pairwise comparisons within the model run.

**Supplementary Figure A10.** MixSIAR results (species: *L. balthica*; preservation method: formalin; OM source data: B; mathematical correction: none). Bhattacharyya’s coefficients for pairwise comparisons within the model run.

**Supplementary Figure A11.** MixSIAR results (species: *L. balthica*; preservation method: formalin; OM source data: B; mathematical correction: formalin correction). Bhattacharyya’s coefficients for pairwise comparisons within the model run and for in between model comparison.

**Supplementary Figure A12.** MixSIAR results (species: *L. balthica*; preservation method: dried; OM source data: B; mathematical correction: lipid normalization). Bhattacharyya’s coefficients for pairwise comparisons with not normalized and lipid removed MixSIAR results.

**Supplementary Figure A13.** MixSIAR results (species: *L. balthica*; preservation method: frozen; OM source data: B; mathematical correction: lipid normalization). Bhattacharyya’s coefficients for pairwise comparisons with not normalized and lipid removed MixSIAR results.

**Supplementary Figure A14.** MixSIAR results (species: *L. balthica*; preservation method: formalin; OM source data: B; mathematical correction: lipid normalization). Bhattacharyya’s coefficients for pairwise comparisons with not normalized and lipid removed MixSIAR results.

**Supplementary Figure A15.** MixSIAR results (species: *C. crangon*; preservation method: dried; OM source data: A; mathematical correction: none). Bhattacharyya’s coefficients for pairwise comparisons within the model run.

**Supplementary Figure A16.** MixSIAR results (species: *C. crangon*; preservation method: frozen; OM source data: A; mathematical correction: none). Bhattacharyya’s coefficients for pairwise comparisons within the model run.

**Supplementary Figure A17.** MixSIAR results (species: *C. crangon*; preservation method: formalin; OM source data: A; mathematical correction: none). Bhattacharyya’s coefficients for pairwise comparisons within the model run.

**Supplementary Figure A18.** MixSIAR results (species: *C. crangon*; preservation method: formalin; OM source data: A; mathematical correction: formalin correction). Bhattacharyya’s coefficients for pairwise comparisons within the model run and for in between model comparison.

**Supplementary Figure A19.** MixSIAR results (species: *C. crangon*; preservation method: dried; OM source data: A; mathematical correction: lipid normalization). Bhattacharyya’s coefficients for pairwise comparisons with not normalized and lipid removed MixSIAR results.

**Supplementary Figure A20.** MixSIAR results (species: *C. crangon*; preservation method: frozen; OM source data: A; mathematical correction: lipid normalization). Bhattacharyya’s coefficients for pairwise comparisons with not normalized and lipid removed MixSIAR results.

**Supplementary Figure A21.** MixSIAR results (species: *C. crangon*; preservation method: formalin; OM source data: A; mathematical correction: lipid normalization). Bhattacharyya’s coefficients for pairwise comparisons with not normalized and lipid removed MixSIAR results.

**Supplementary Figure A22.** MixSIAR results (species: *C. crangon*; preservation method: dried; OM source data: B; mathematical correction: none). Bhattacharyya’s coefficients for pairwise comparisons within the model run.

**Supplementary Figure A23.** MixSIAR results (species: *C. crangon*; preservation method: frozen; OM source data: B; mathematical correction: none). Bhattacharyya’s coefficients for pairwise comparisons within the model run.

**Supplementary Figure A24.** MixSIAR results (species: *C. crangon*; preservation method: formalin; OM source data: B; mathematical correction: none). Bhattacharyya’s coefficients for pairwise comparisons within the model run.

**Supplementary Figure A25.** MixSIAR results (species: *C. crangon*; preservation method: formalin; OM source data: B; mathematical correction: formalin correction). Bhattacharyya’s coefficients for pairwise comparisons within the model run and for in between model comparison.

**Supplementary Figure A26.** MixSIAR results (species: *C. crangon*; preservation method: dried; OM source data: B; mathematical correction: lipid normalization). Bhattacharyya’s coefficients for pairwise comparisons with not normalized and lipid removed MixSIAR results.

**Supplementary Figure A27.** MixSIAR results (species: *C. crangon*; preservation method: frozen; OM source data: B; mathematical correction: lipid normalization). Bhattacharyya’s coefficients for pairwise comparisons with not normalized and lipid removed MixSIAR results.

**Supplementary Figure A28.** MixSIAR results (species: *C. crangon*; preservation method: formalin; OM source data: B; mathematical correction: lipid normalization). Bhattacharyya’s coefficients for pairwise comparisons with not normalized and lipid removed MixSIAR results.

**Supplementary Table A29.** Bhattacharyya’s coefficients for pairwise comparisons between model runs using OM source data A and OM source data B.


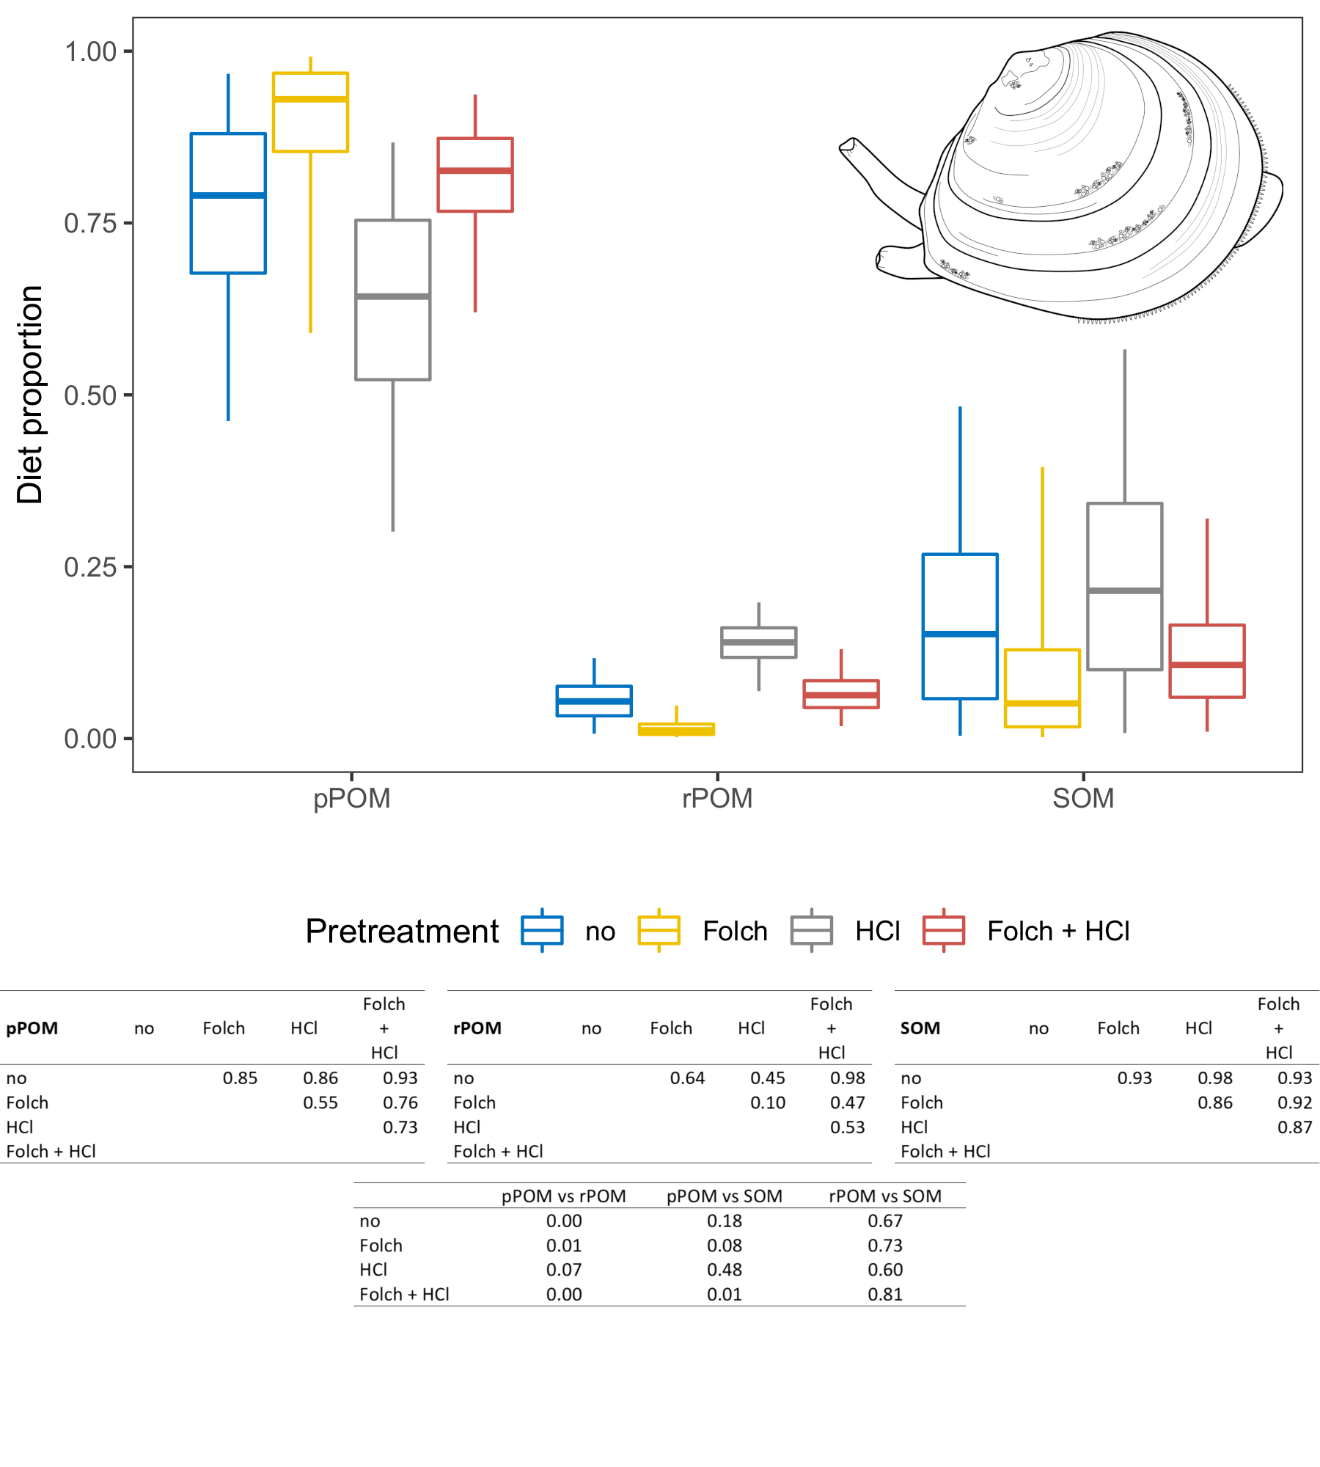
**Supplementary Figure A1.** MixSIAR posterior distribution for *Limecola balthica* (preservation method: dried; OM source data: A; mathematical correction: none). Colors indicate the applied pre-treatments. Boxplots depict median (horizontal line) with 50% (box) and 95% credible intervals (vertical line). Bhattacharyya’s coefficients for pairwise comparisons between pre-treatments are given for each OM source in triangular matrices. Bhattacharyya’s coefficients for pairwise comparisons between OM sources are given for each pre-treatment in the rectangular matrix.

**Supplementary Figure A2.** MixSIAR posterior distribution for *Limecola balthica* (preservation method: frozen; OM source data: A; mathematical correction: none). Colors indicate the applied pre-treatments. Boxplots depict median (horizontal line) with 50% (box) and 95% credible intervals (vertical line). Bhattacharyya’s coefficients for pairwise comparisons between pre-treatments are given for each OM source in triangular matrices. Bhattacharyya’s coefficients for pairwise comparisons between OM sources are given for each pre-treatment in the rectangular matrix.


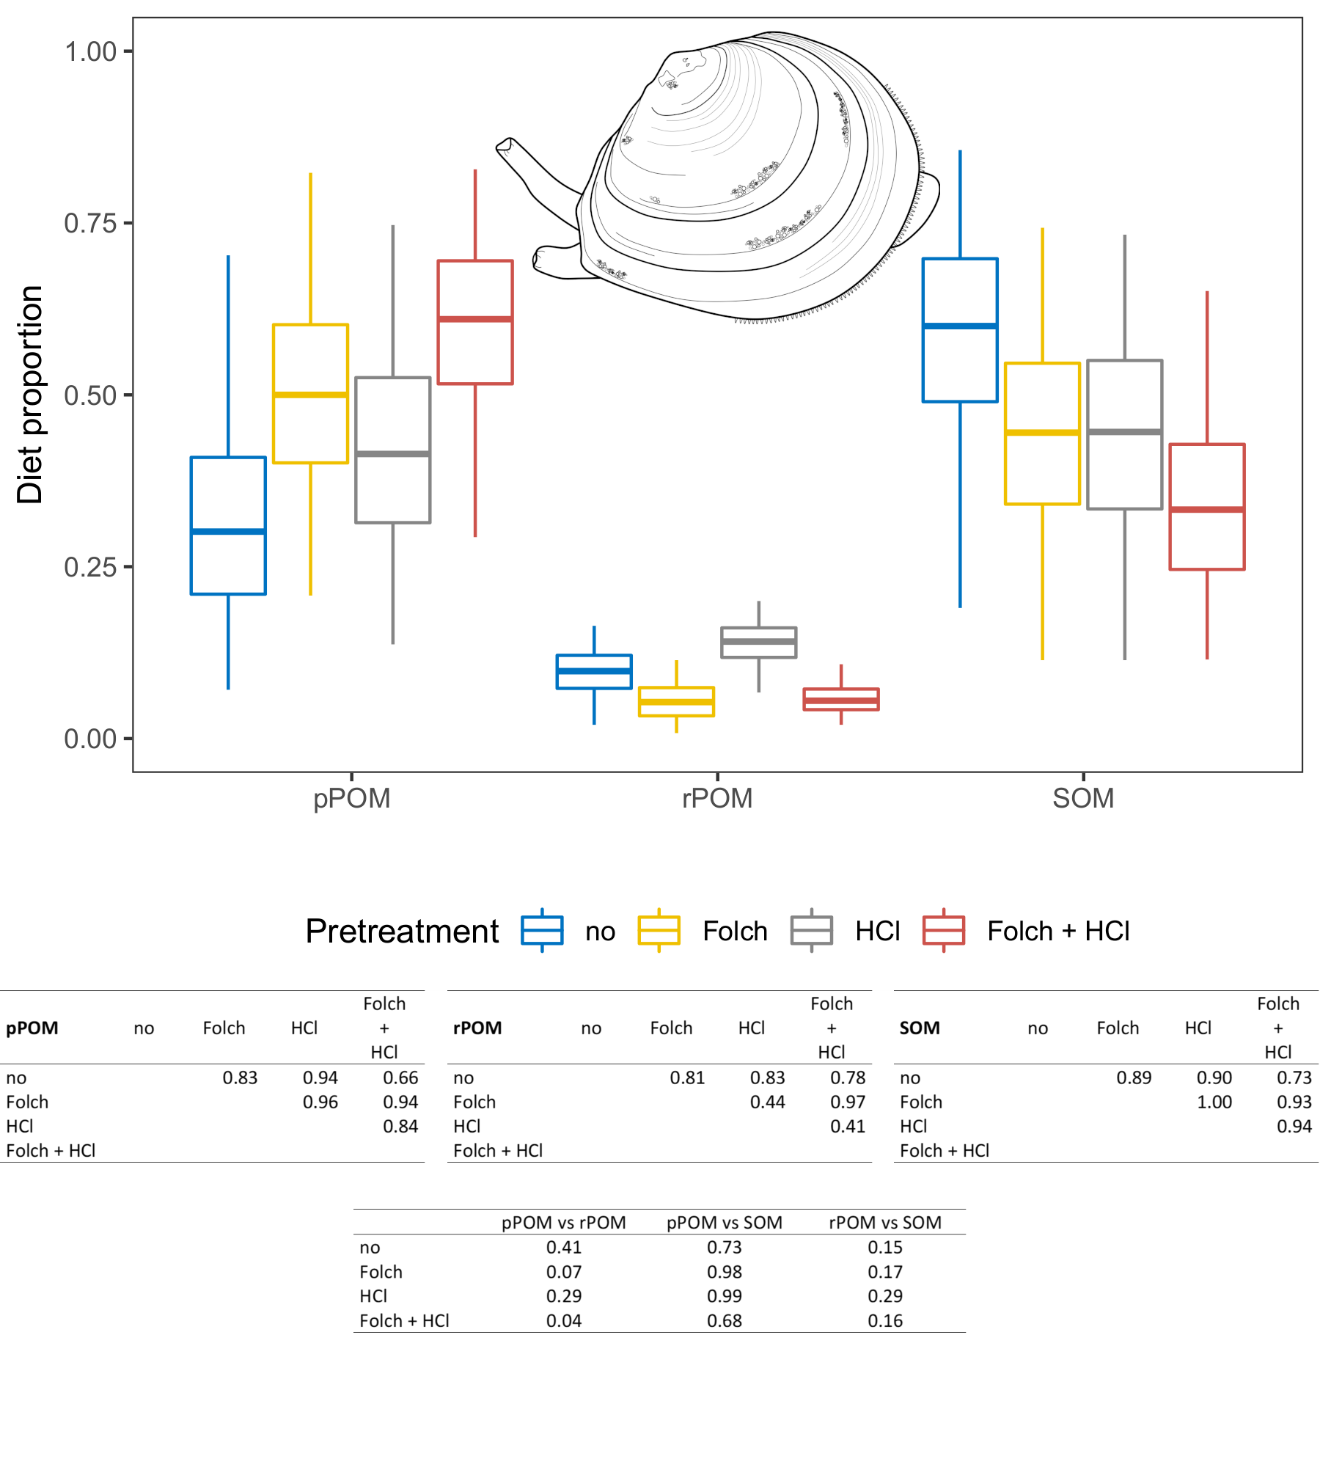


**Supplementary Figure A3.** MixSIAR posterior distribution for *Limecola balthica* (preservation method: formalin; OM source data: A; mathematical correction: none). Colors indicate the applied pre-treatments. Boxplots depict median (horizontal line) with 50% (box) and 95% credible intervals (vertical line). Bhattacharyya’s coefficients for pairwise comparisons between pre-treatments are given for each OM source in triangular matrices. Bhattacharyya’s coefficients for pairwise comparisons between OM sources are given for each pre-treatment in the rectangular matrix.


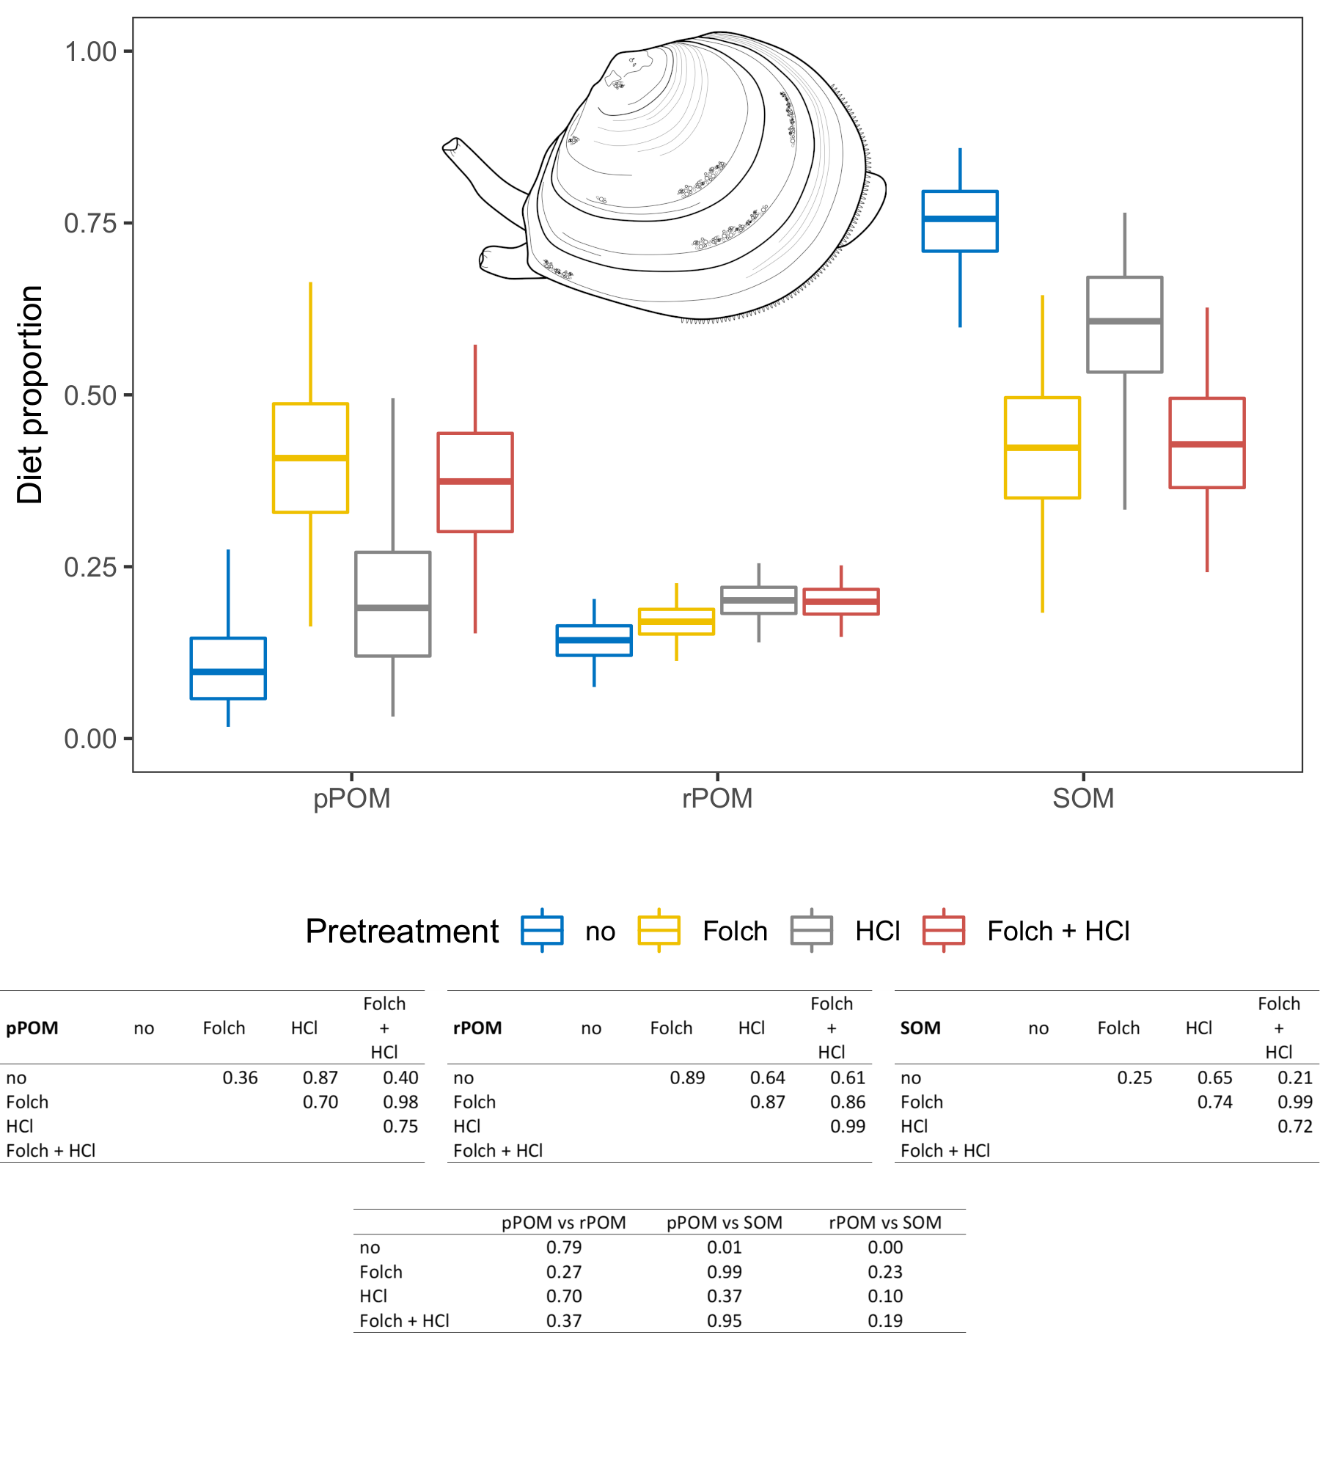


**Supplementary Figure A4.** MixSIAR posterior distribution for *Limecola balthica* (preservation method: formalin; OM source data: A; mathematical correction: Formalin correction according to Vander Zanden et al. (2003)). Colors indicate the applied pre-treatments. Boxplots depict median (horizontal line) with 50% (box) and 95% credible intervals (vertical line). Bhattacharyya’s coefficients for pairwise comparisons among different preservation methods (compare Supplementary Figures 1-3) and between each preservation methods and formalin corrected data are given in the upper and lower matrix, respectively.


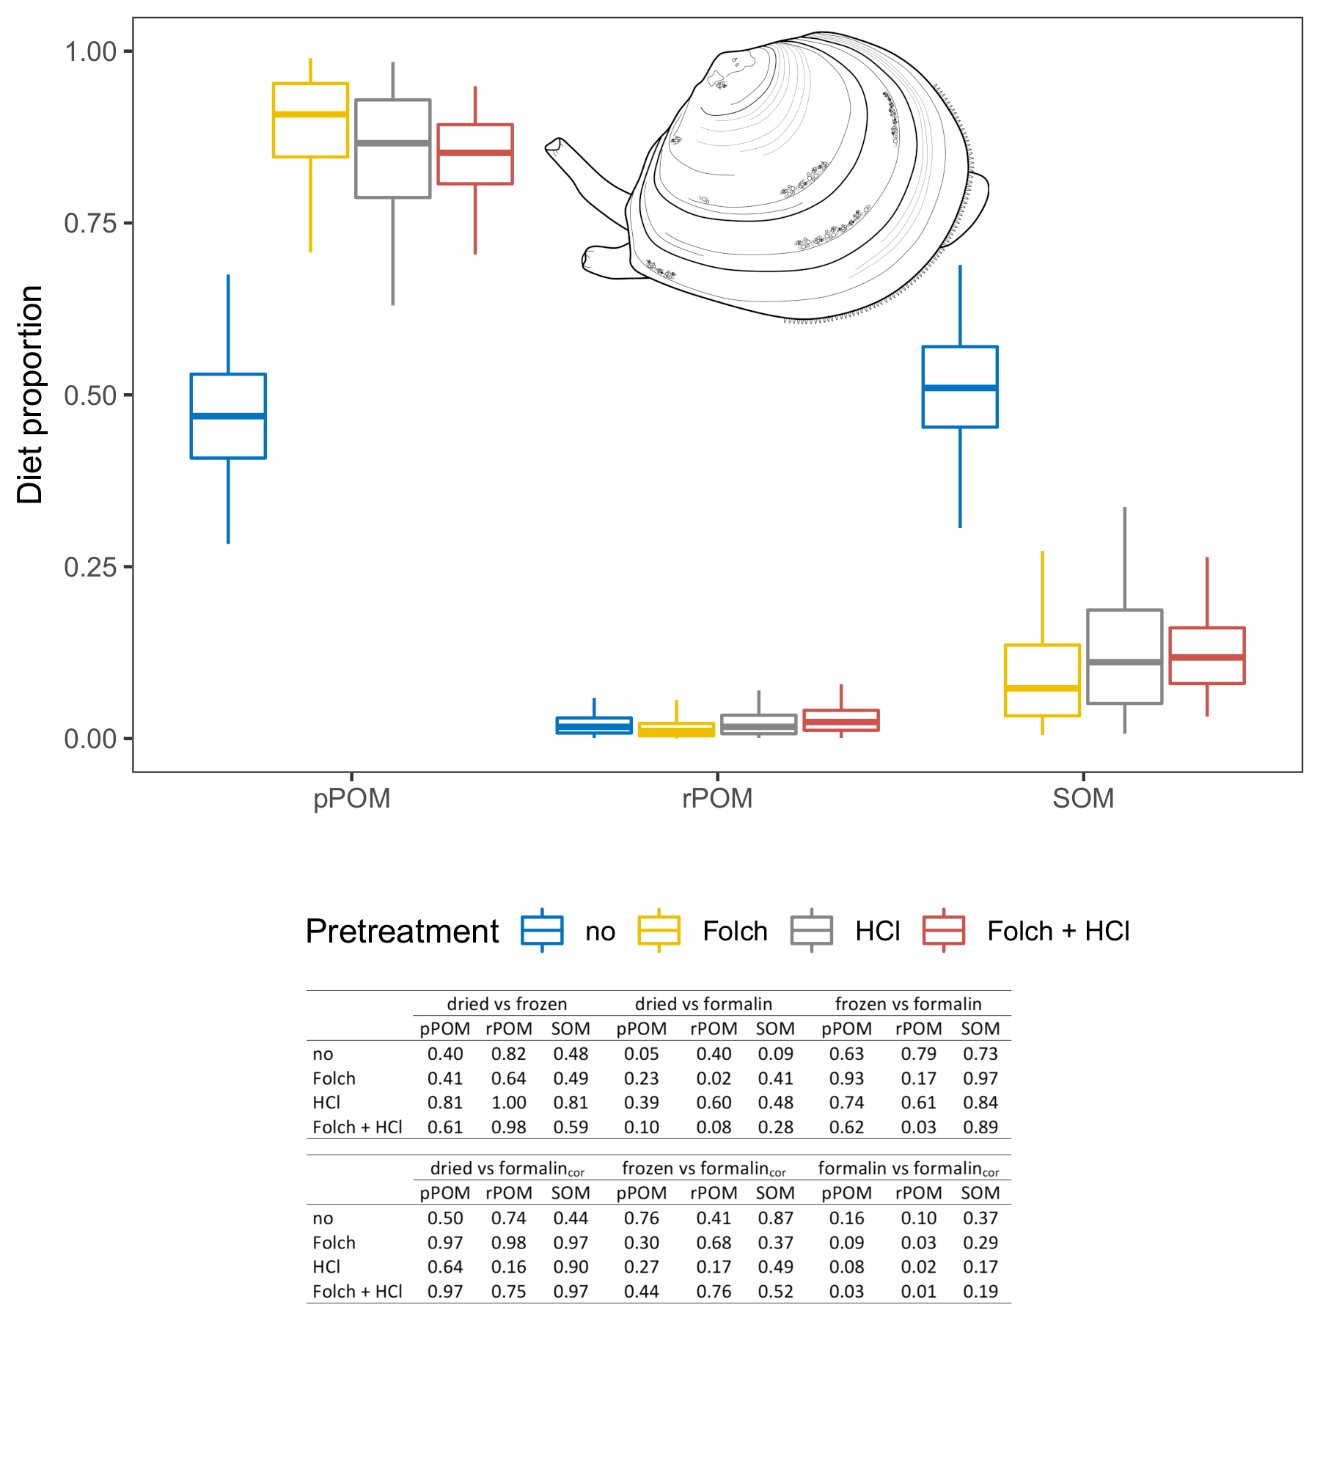


**Supplementary Figure A5.** MixSIAR posterior distribution for *Limecola balthica* (preservation method: dried; OM source data: A; mathematical correction: Lipid normalization according to McConnaughey and McRoy (1979) (*left*) and according to Post et al. (2007) (*right*)). Colors indicate the applied pre-treatments. Boxplots depict median (horizontal line) with 50% (box) and 95% credible intervals (vertical line). Bhattacharyya’s coefficients for pairwise comparisons for each OM source between lipid intact (compare Supplementary Figure 1), lipid removed (compare Supplementary Figure 1), and lipid normalized data are given below each MixSIAR result.


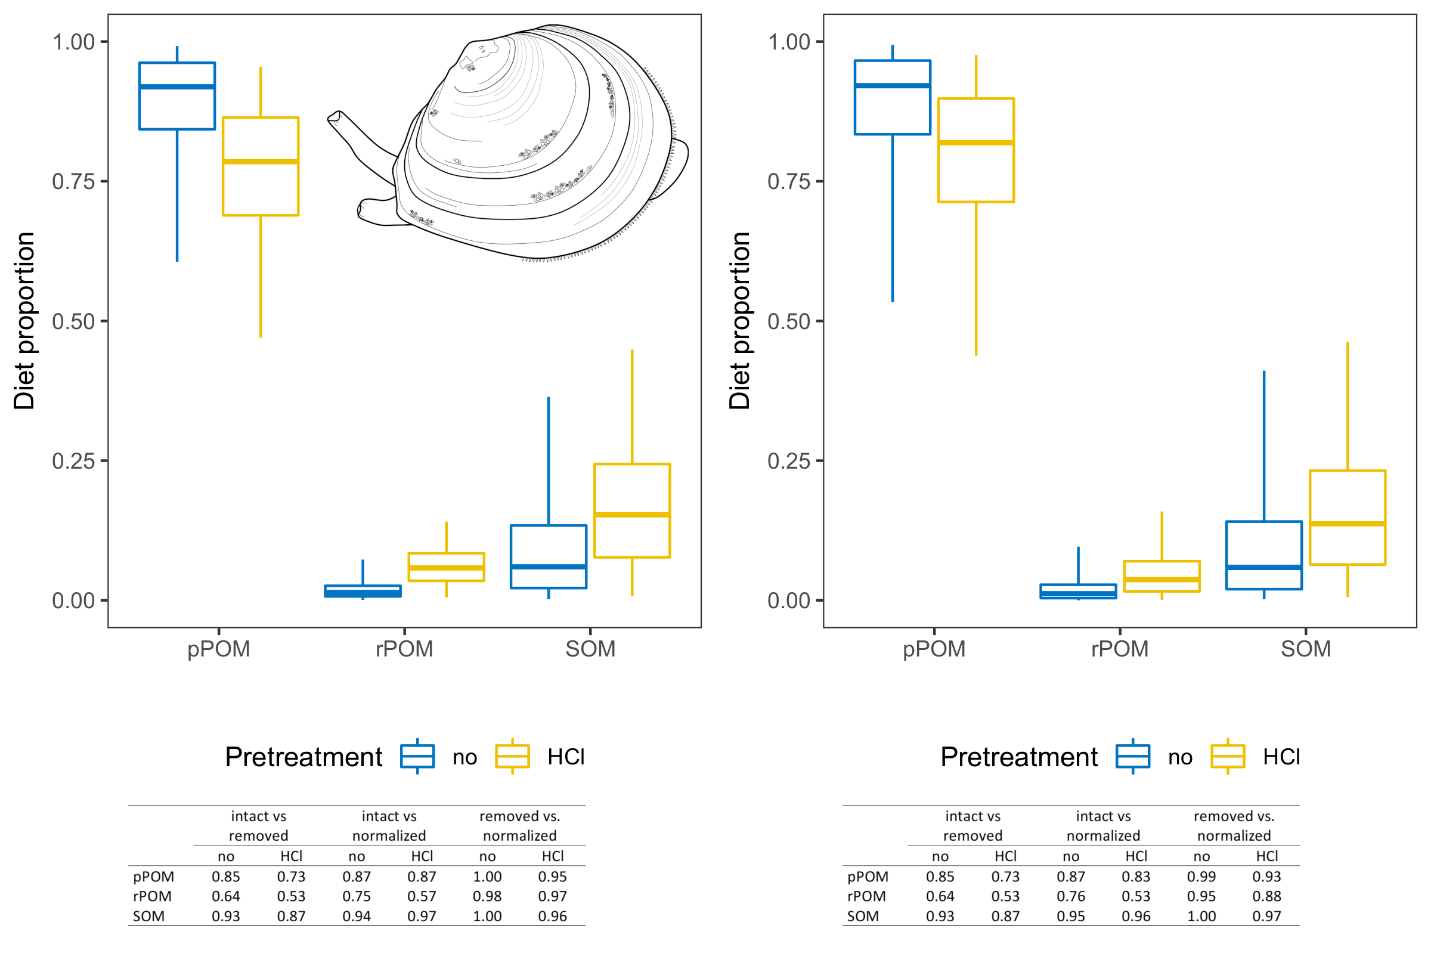


**Supplementary Figure A6.** MixSIAR posterior distribution for *Limecola balthica* (preservation method: frozen; OM source data: A; mathematical correction: Lipid normalization according to McConnaughey and McRoy (1979) (*left*) and according to Post et al. (2007) (*right*)). Colors indicate the applied pre-treatments. Boxplots depict median (horizontal line) with 50% (box) and 95% credible intervals (vertical line). Bhattacharyya’s coefficients for pairwise comparisons for each OM source between lipid intact (compare Supplementary Figure 2), lipid removed (compare Supplementary Figure 2), and lipid normalized data are given below each MixSIAR result.


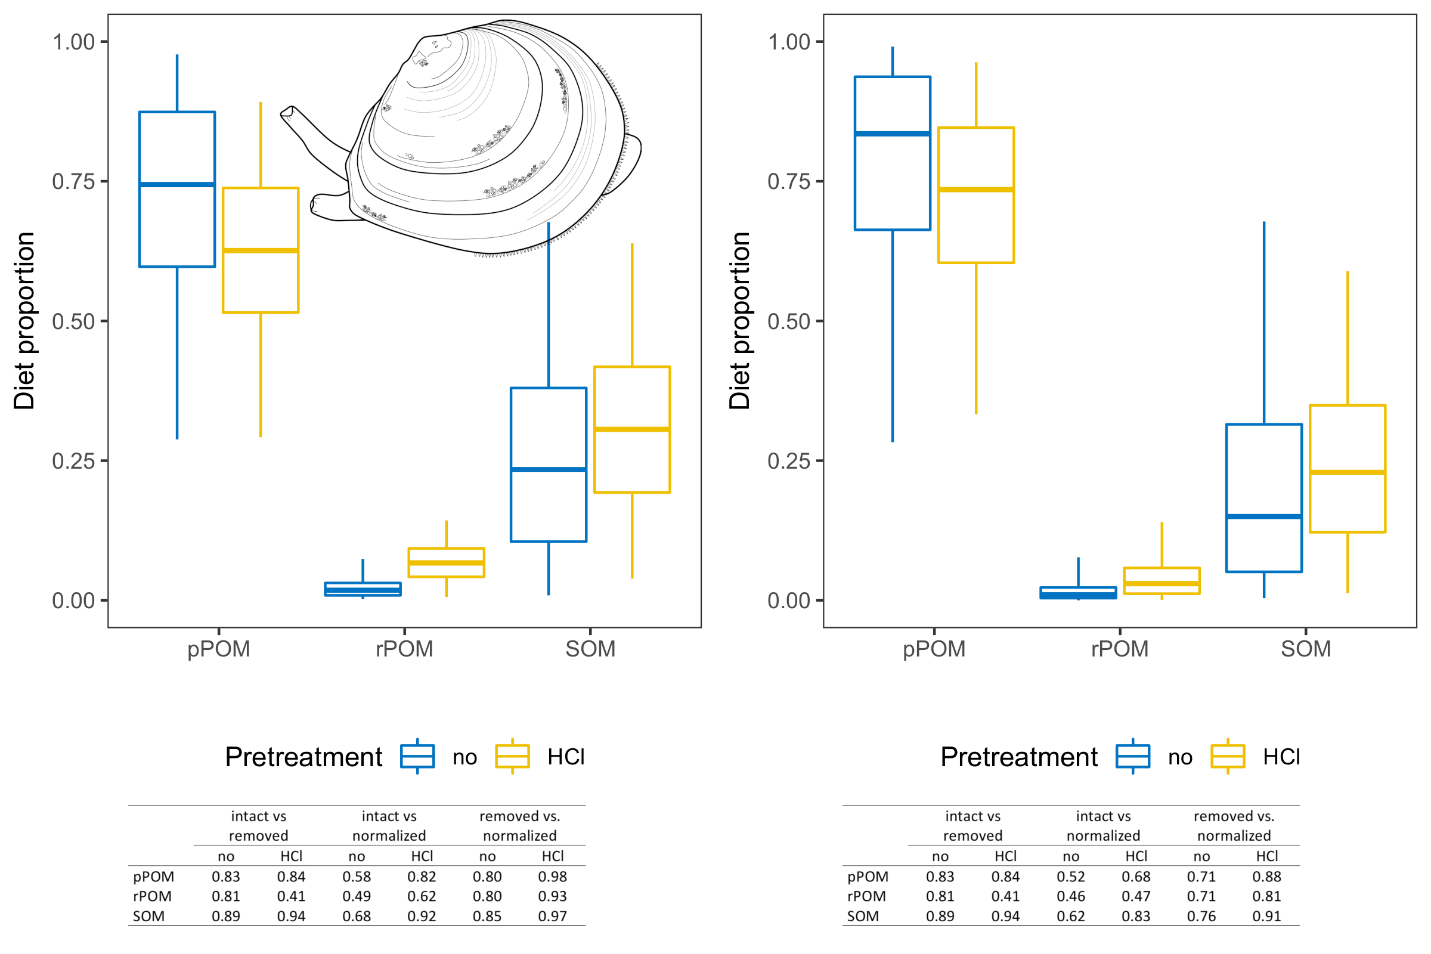


**Supplementary Figure A7.** MixSIAR posterior distribution for *Limecola balthica* (preservation method: formalin; OM source data: A; mathematical correction: Lipid normalization according to McConnaughey and McRoy (1979) (*left*) and according to Post et al. (2007) (*right*)). Colors indicate the applied pre-treatments. Boxplots depict median (horizontal line) with 50% (box) and 95% credible intervals (vertical line). Bhattacharyya’s coefficients for pairwise comparisons for each OM source between lipid intact (compare Supplementary Figure 3), lipid removed (compare Supplementary Figure 3), and lipid normalized data are given below each MixSIAR result.


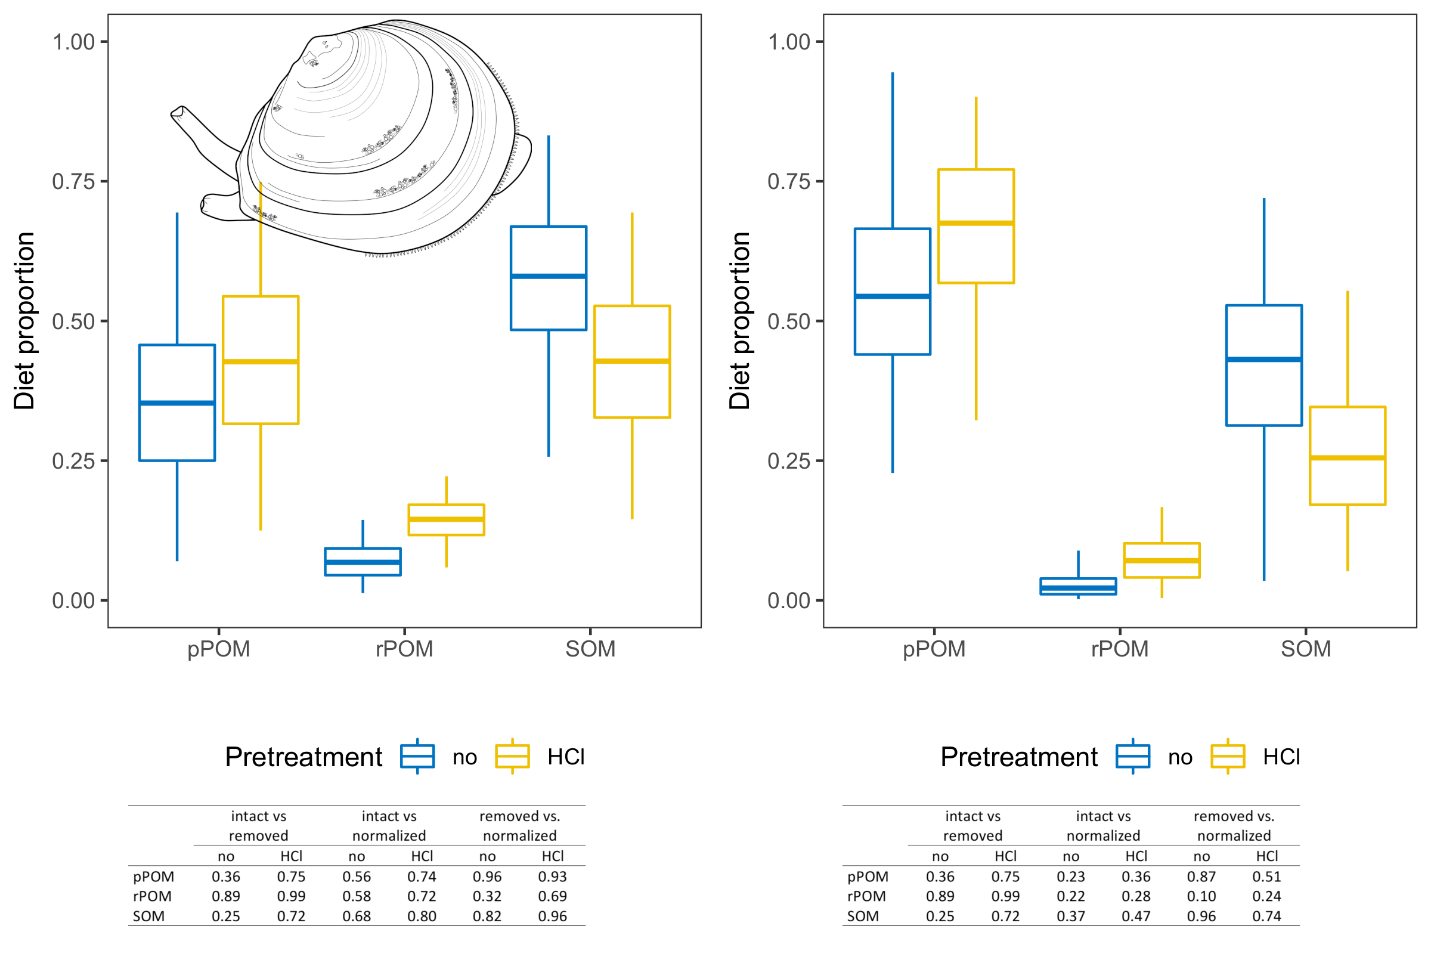


**Supplementary Figure A8.** MixSIAR posterior distribution for *Limecola balthica* (preservation method: dried; OM source data: B; mathematical correction: none). Colors indicate the applied pre-treatments. Boxplots depict median (horizontal line) with 50% (box) and 95% credible intervals (vertical line). Bhattacharyya’s coefficients for pairwise comparisons between pre-treatments are given for each OM source in triangular matrices. Bhattacharyya’s coefficients for pairwise comparisons between OM sources are given for each pre-treatment in the rectangular matrix.


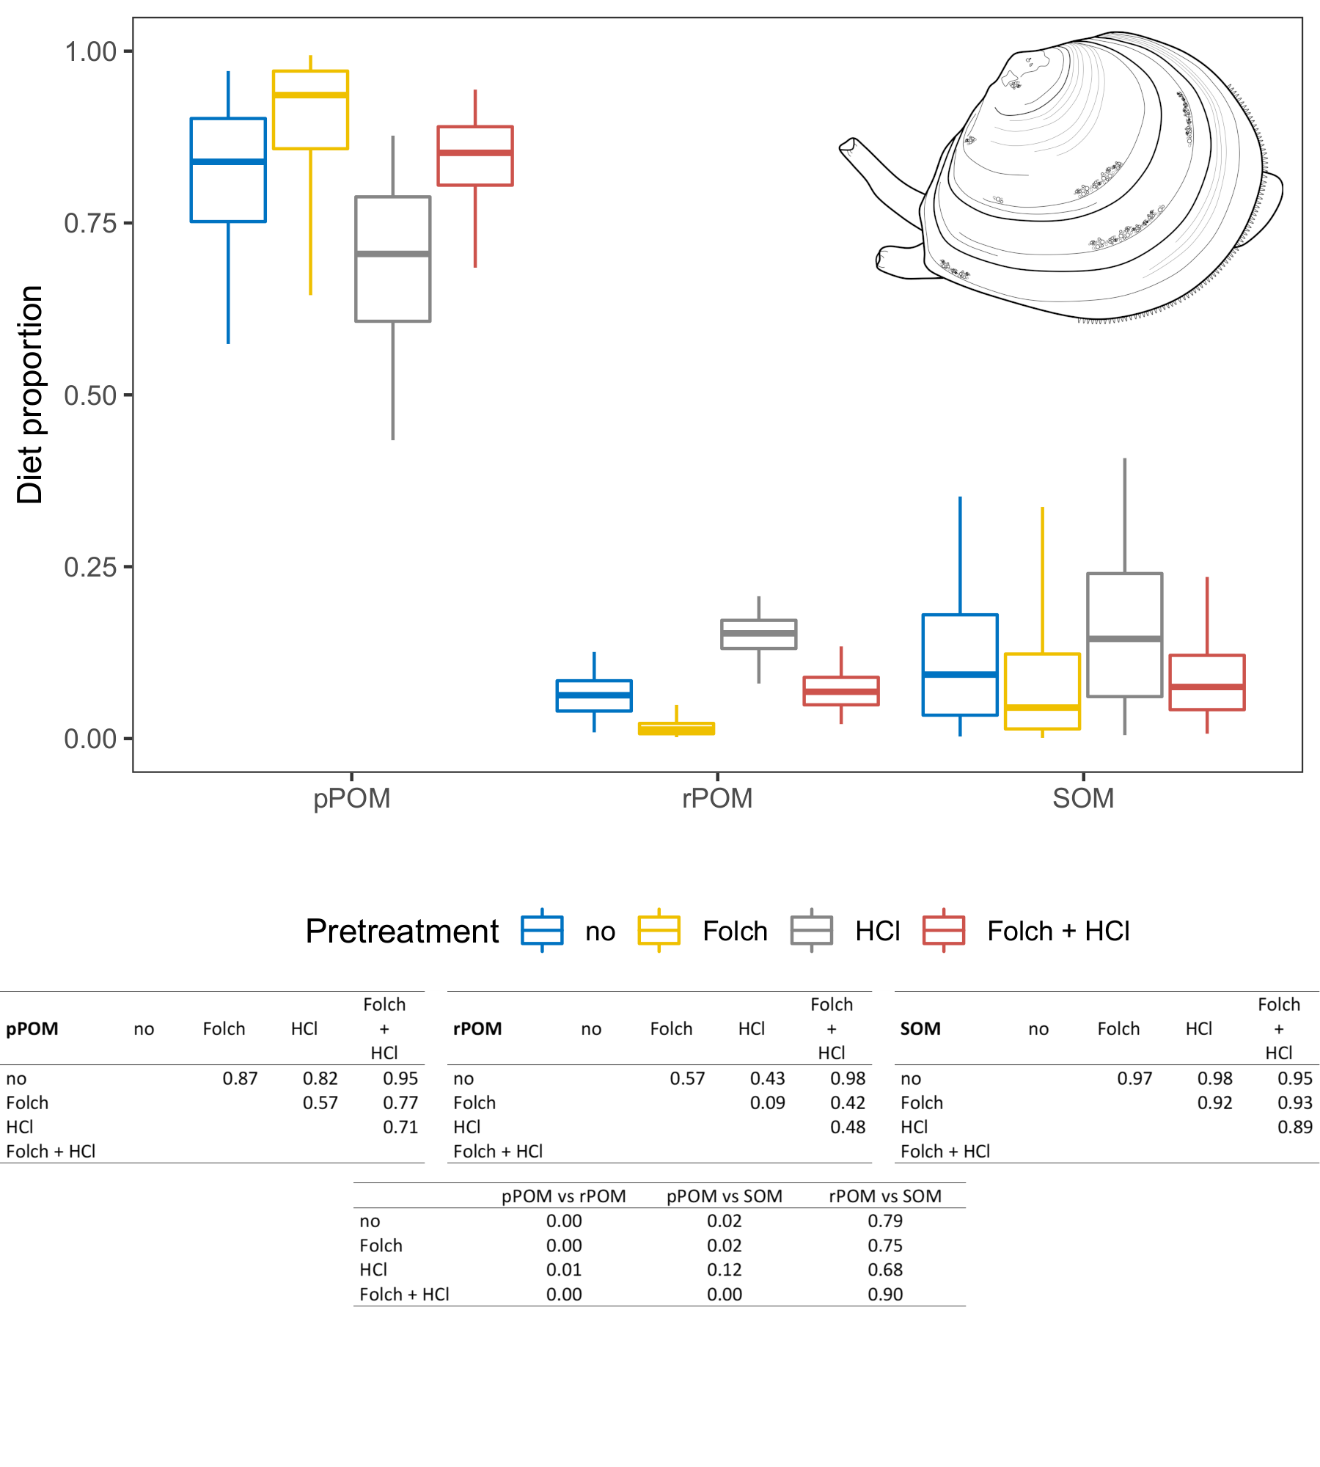


**Supplementary Figure A9.** MixSIAR posterior distribution for *Limecola balthica* (preservation method: frozen; OM source data: B; mathematical correction: none). Colors indicate the applied pre-treatments. Boxplots depict median (horizontal line) with 50% (box) and 95% credible intervals (vertical line). Bhattacharyya’s coefficients for pairwise comparisons between pre-treatments are given for each OM source in triangular matrices. Bhattacharyya’s coefficients for pairwise comparisons between OM sources are given for each pre-treatment in the rectangular matrix.


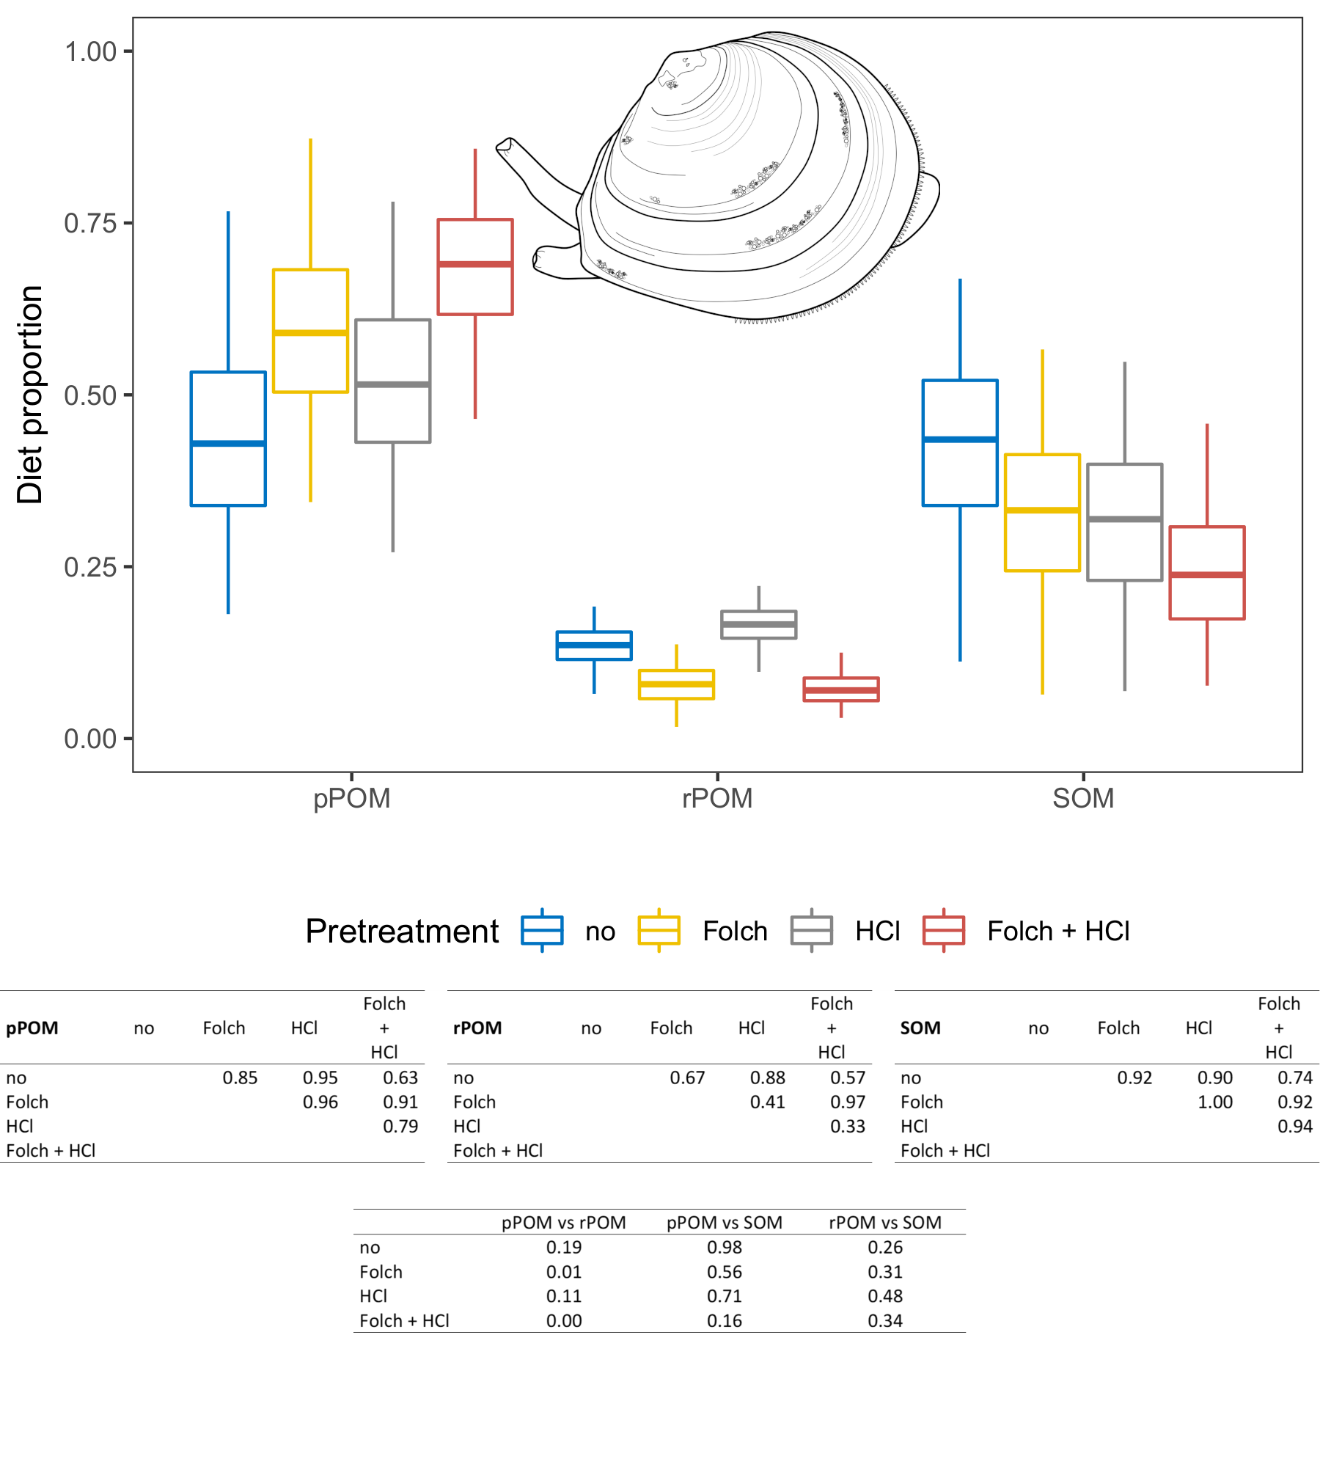


**Supplementary Figure A10.** MixSIAR posterior distribution for *Limecola balthica* (preservation method: formalin; OM source data: B; mathematical correction: none). Colors indicate the applied pre-treatments. Boxplots depict median (horizontal line) with 50% (box) and 95% credible intervals (vertical line). Bhattacharyya’s coefficients for pairwise comparisons between pre-treatments are given for each OM source in triangular matrices. Bhattacharyya’s coefficients for pairwise comparisons between OM sources are given for each pre-treatment in the rectangular matrix.


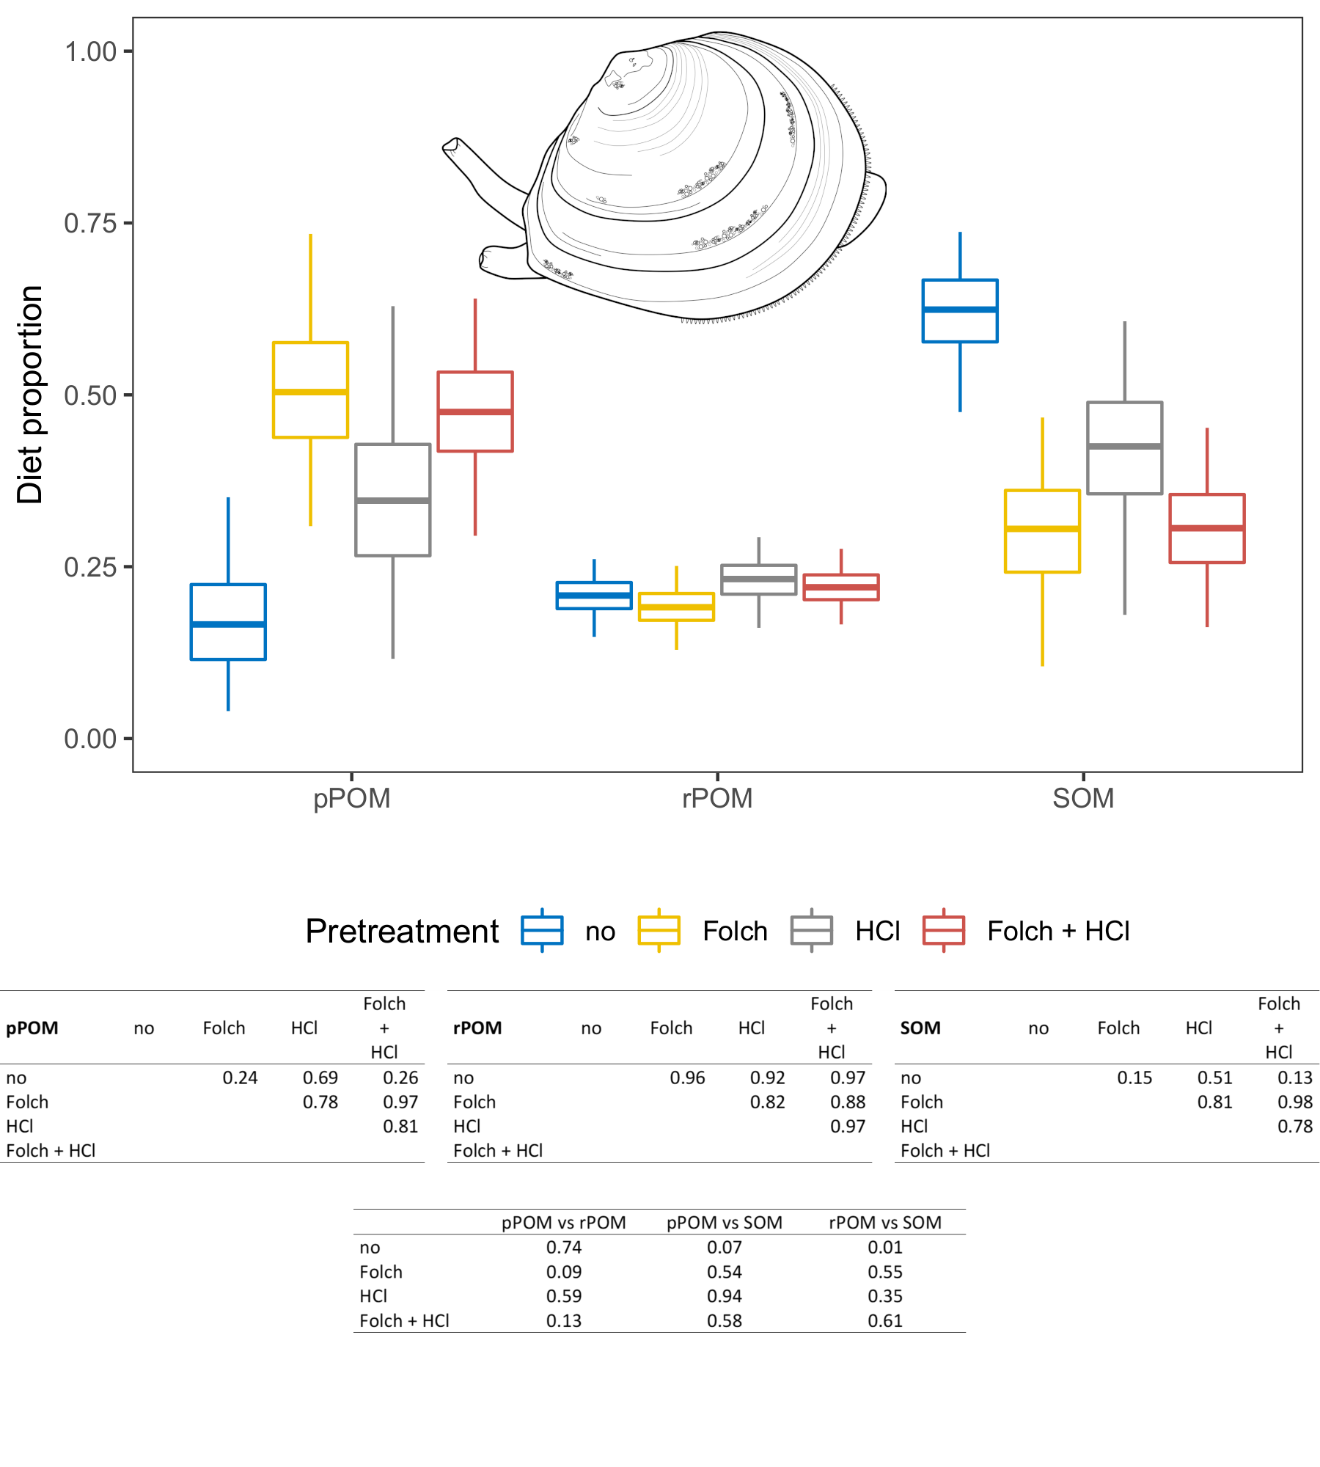


**Supplementary Figure A11.** MixSIAR posterior distribution for *Limecola balthica* (preservation method: formalin; OM source data: B; mathematical correction: Formalin correction according to Vander Zanden et al. (2003)). Colors indicate the applied pre-treatments. Boxplots depict median (horizontal line) with 50% (box) and 95% credible intervals (vertical line). Bhattacharyya’s coefficients for pairwise comparisons among different preservation methods (compare Supplementary Figures 8-10) and between each preservation methods and formalin corrected data are given in the upper and lower matrix, respectively.


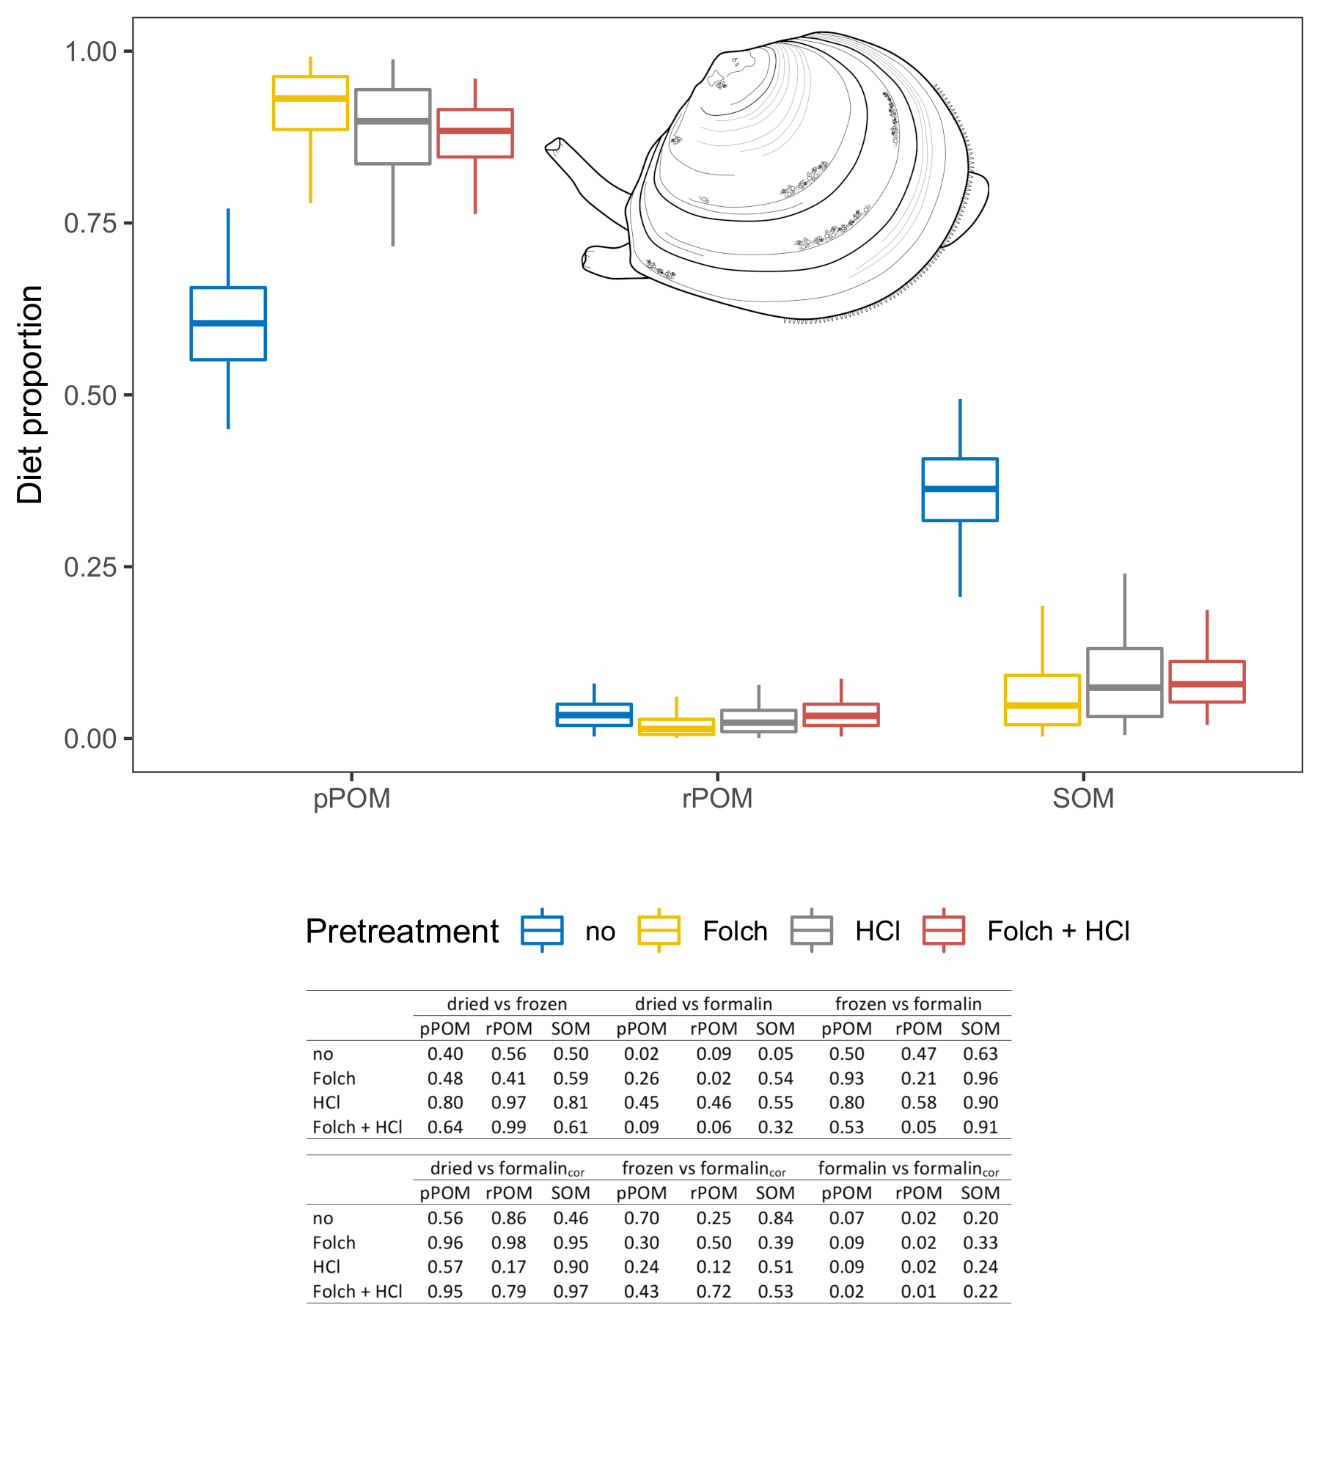


**Supplementary Figure A12.** MixSIAR posterior distribution for *Limecola balthica* (preservation method: dried; OM source data: B; mathematical correction: Lipid normalization according to McConnaughey and McRoy (1979) (*left*) and according to Post et al. (2007) (*right*)). Colors indicate the applied pre-treatments. Boxplots depict median (horizontal line) with 50% (box) and 95% credible intervals (vertical line). Bhattacharyya’s coefficients for pairwise comparisons for each OM source between lipid intact (compare Supplementary Figure 8), lipid removed (compare Supplementary Figure 8), and lipid normalized data are given below each MixSIAR result.


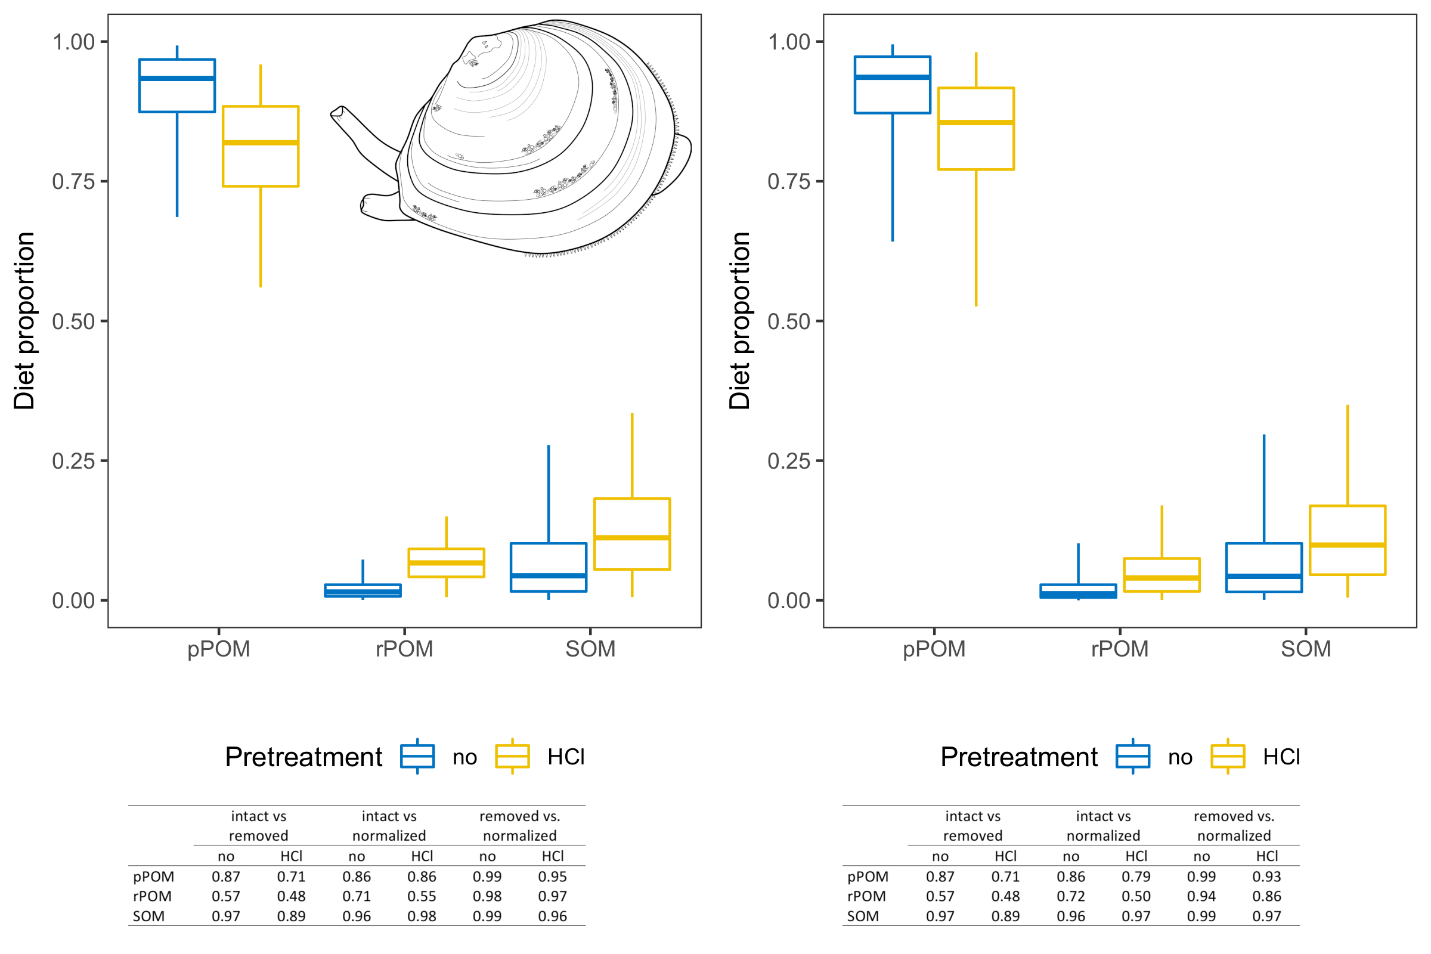


**Supplementary Figure A13.** MixSIAR posterior distribution for *Limecola balthica* (preservation method: frozen; OM source data: B; mathematical correction: Lipid normalization according to McConnaughey and McRoy (1979) (*left*) and according to Post et al. (2007) (*right*)). Colors indicate the applied pre-treatments. Boxplots depict median (horizontal line) with 50% (box) and 95% credible intervals (vertical line). Bhattacharyya’s coefficients for pairwise comparisons for each OM source between lipid intact (compare Supplementary Figure 9), lipid removed (compare Supplementary Figure 9), and lipid normalized data are given below each MixSIAR result.


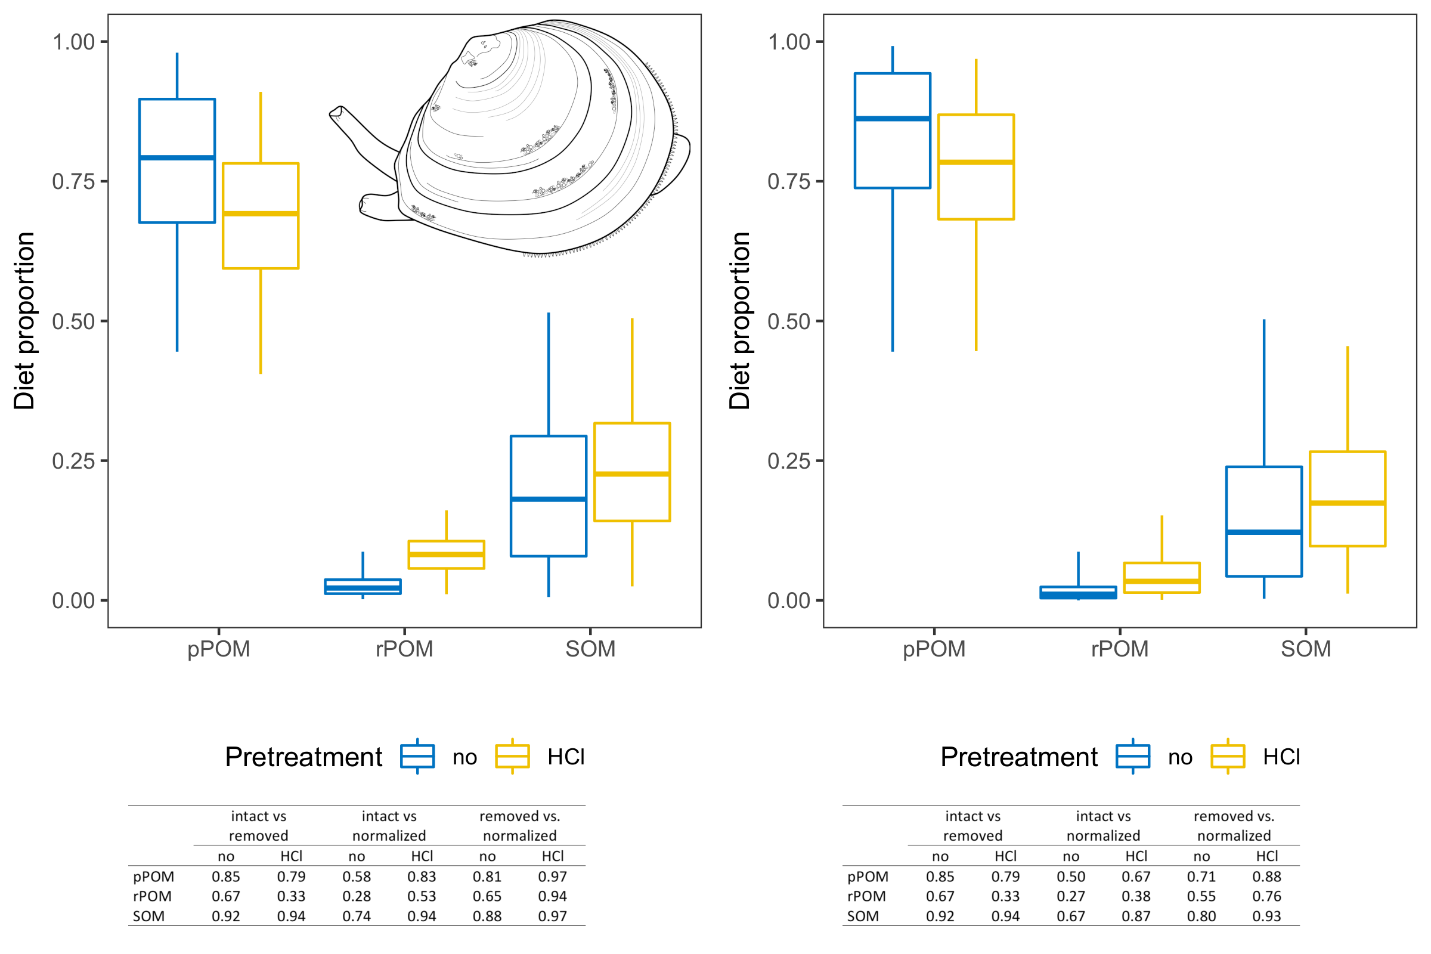


**Supplementary Figure A14.** MixSIAR posterior distribution for *Limecola balthica* (preservation method: formalin; OM source data: B; mathematical correction: Lipid normalization according to McConnaughey and McRoy (1979) (*left*) and according to Post et al. (2007) (*right*)). Colors indicate the applied pre-treatments. Boxplots depict median (horizontal line) with 50% (box) and 95% credible intervals (vertical line). Bhattacharyya’s coefficients for pairwise comparisons for each OM source between lipid intact (compare Supplementary Figure 10), lipid removed (compare Supplementary Figure 10), and lipid normalized data are given below each MixSIAR result.


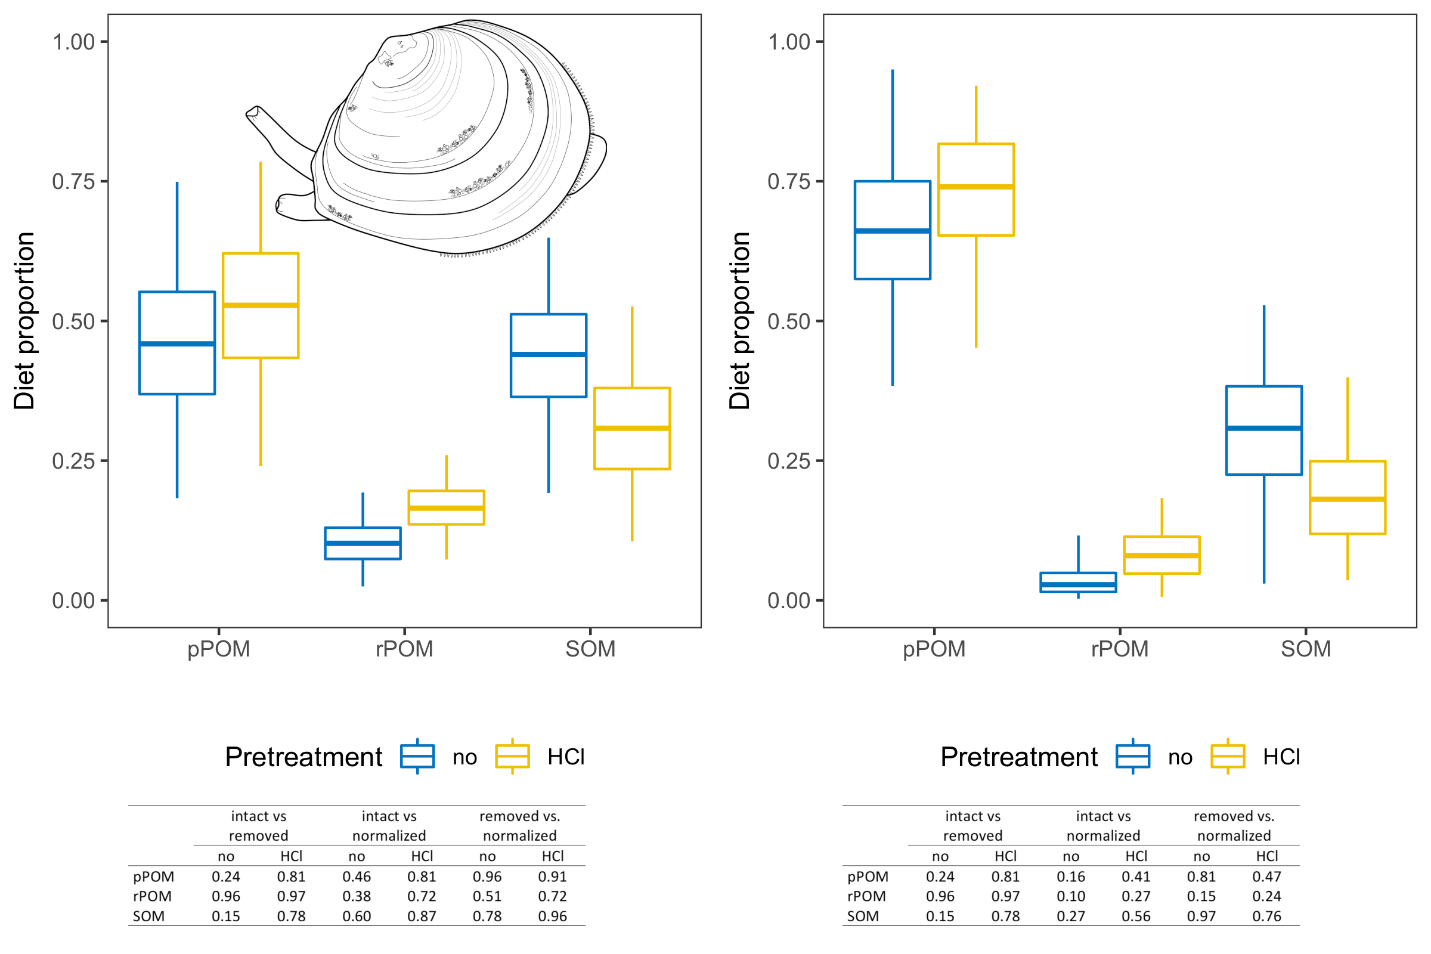


**Supplementary Figure A15.** MixSIAR posterior distribution for *Crangon crangon* (preservation method: dried; OM source data: A; mathematical correction: none). Colors indicate the applied pre-treatments. Boxplots depict median (horizontal line) with 50% (box) and 95% credible intervals (vertical line). Bhattacharyya’s coefficients for pairwise comparisons between pre-treatments are given for each OM source in triangular matrices. Bhattacharyya’s coefficients for pairwise comparisons between OM sources are given for each pre-treatment in the rectangular matrix.


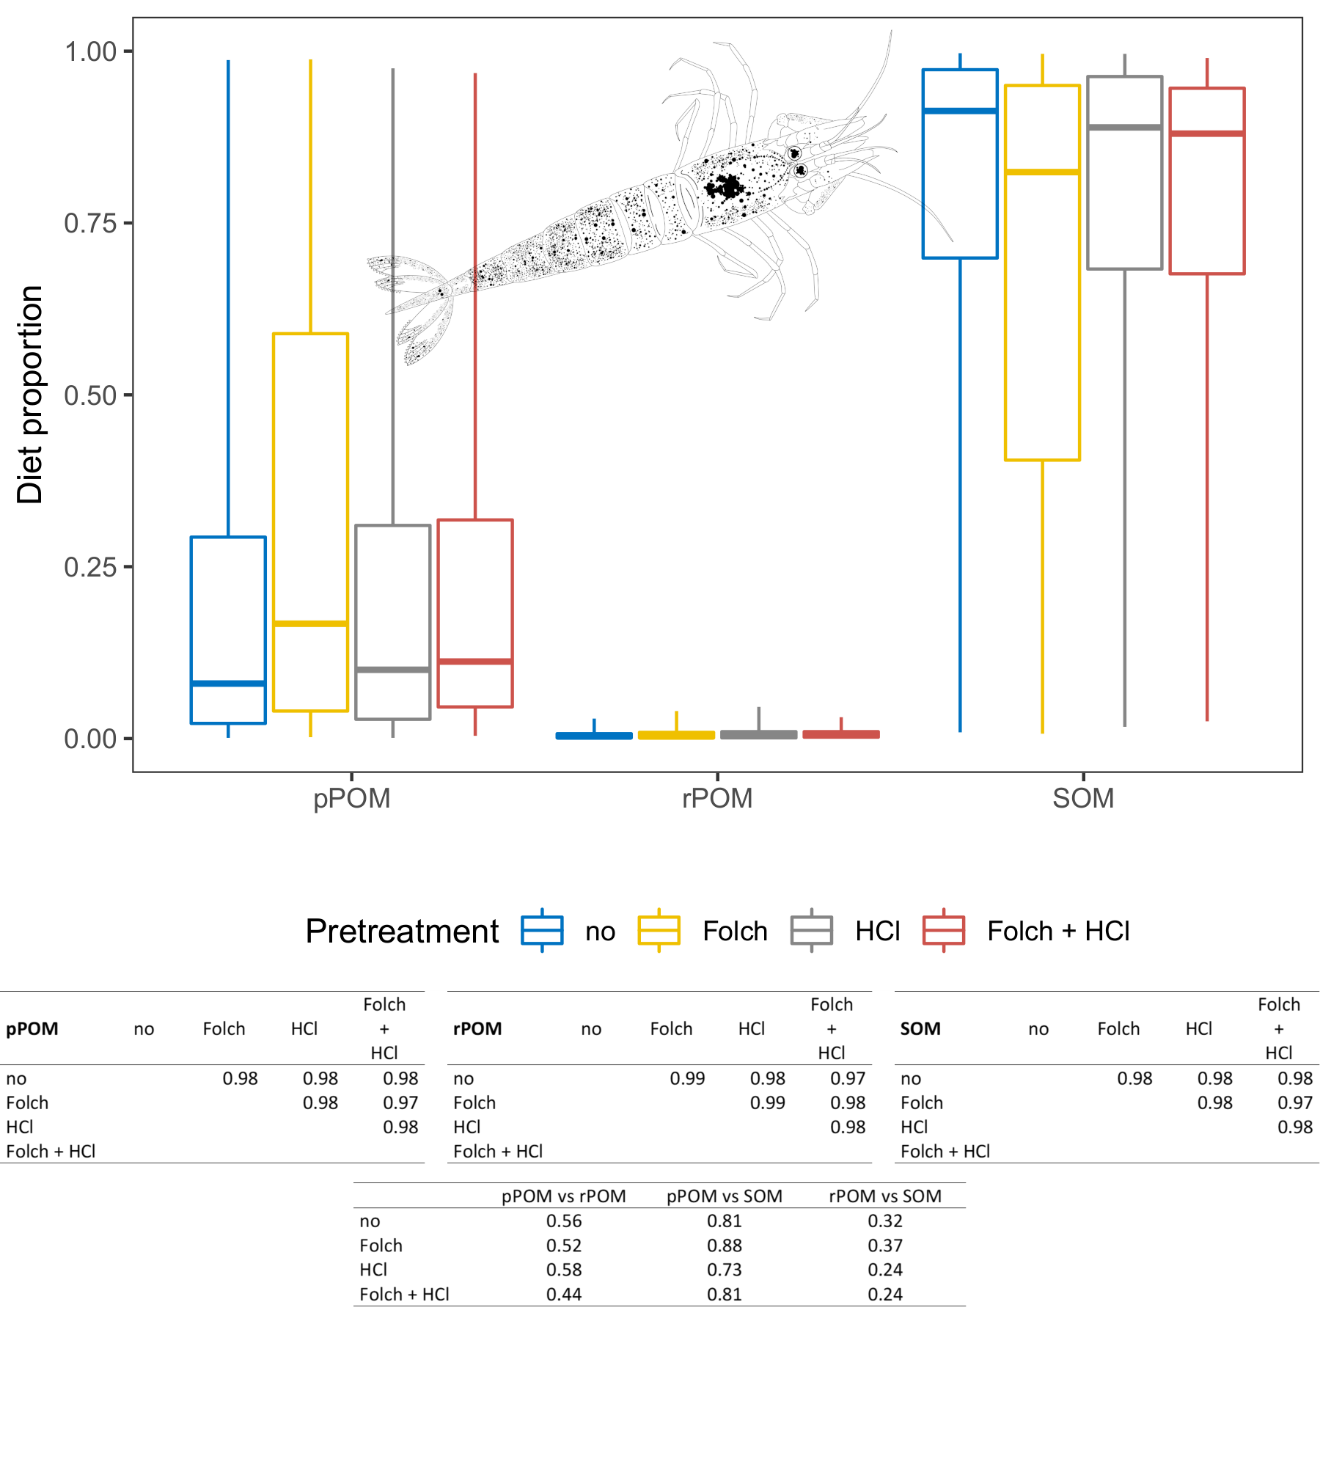


**Supplementary Figure A16.** MixSIAR posterior distribution for *Crangon crangon* (preservation method: frozen; OM source data: A; mathematical correction: none). Colors indicate the applied pre-treatments. Boxplots depict median (horizontal line) with 50% (box) and 95% credible intervals (vertical line). Bhattacharyya’s coefficients for pairwise comparisons between pre-treatments are given for each OM source in triangular matrices. Bhattacharyya’s coefficients for pairwise comparisons between OM sources are given for each pre-treatment in the rectangular matrix.


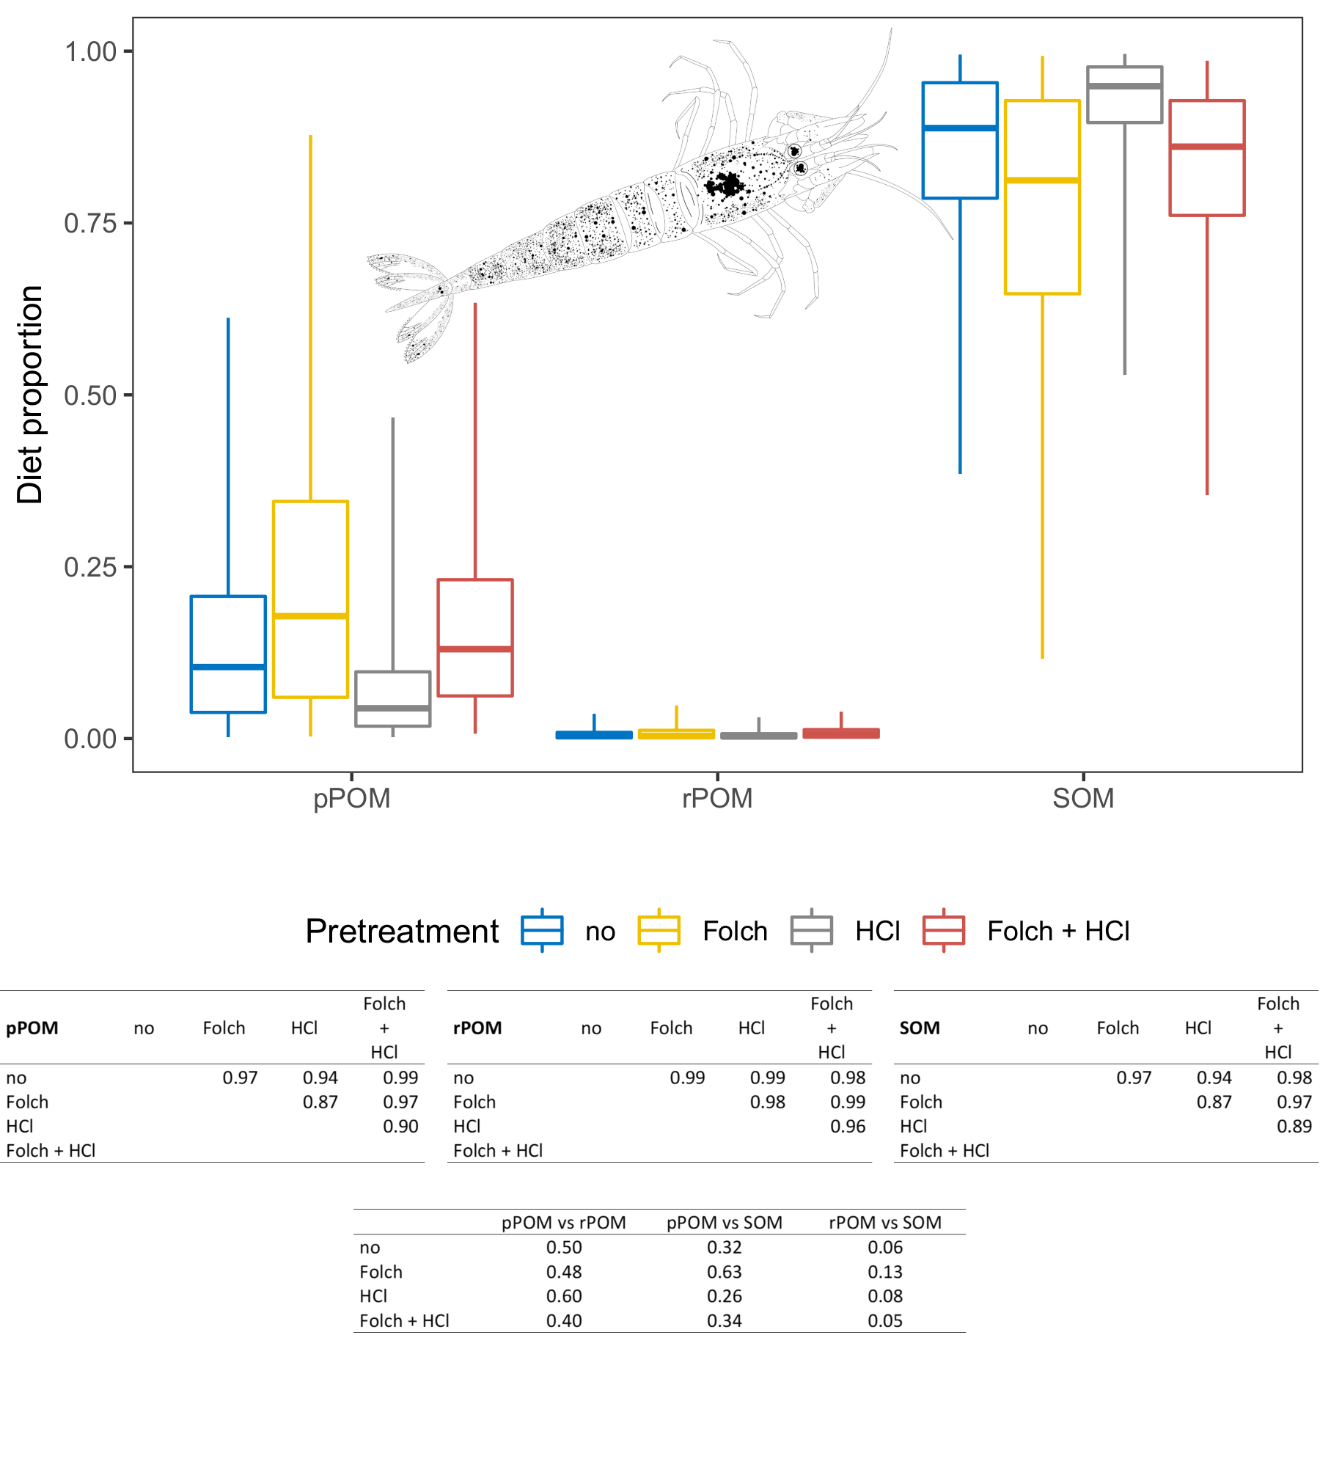


**Supplementary Figure A17.** MixSIAR posterior distribution for *Crangon crangon* (preservation method: formalin; OM source data: A; mathematical correction: none). Colors indicate the applied pre-treatments. Boxplots depict median (horizontal line) with 50% (box) and 95% credible intervals (vertical line). Bhattacharyya’s coefficients for pairwise comparisons between pre-treatments are given for each OM source in triangular matrices. Bhattacharyya’s coefficients for pairwise comparisons between OM sources are given for each pre-treatment in the rectangular matrix.


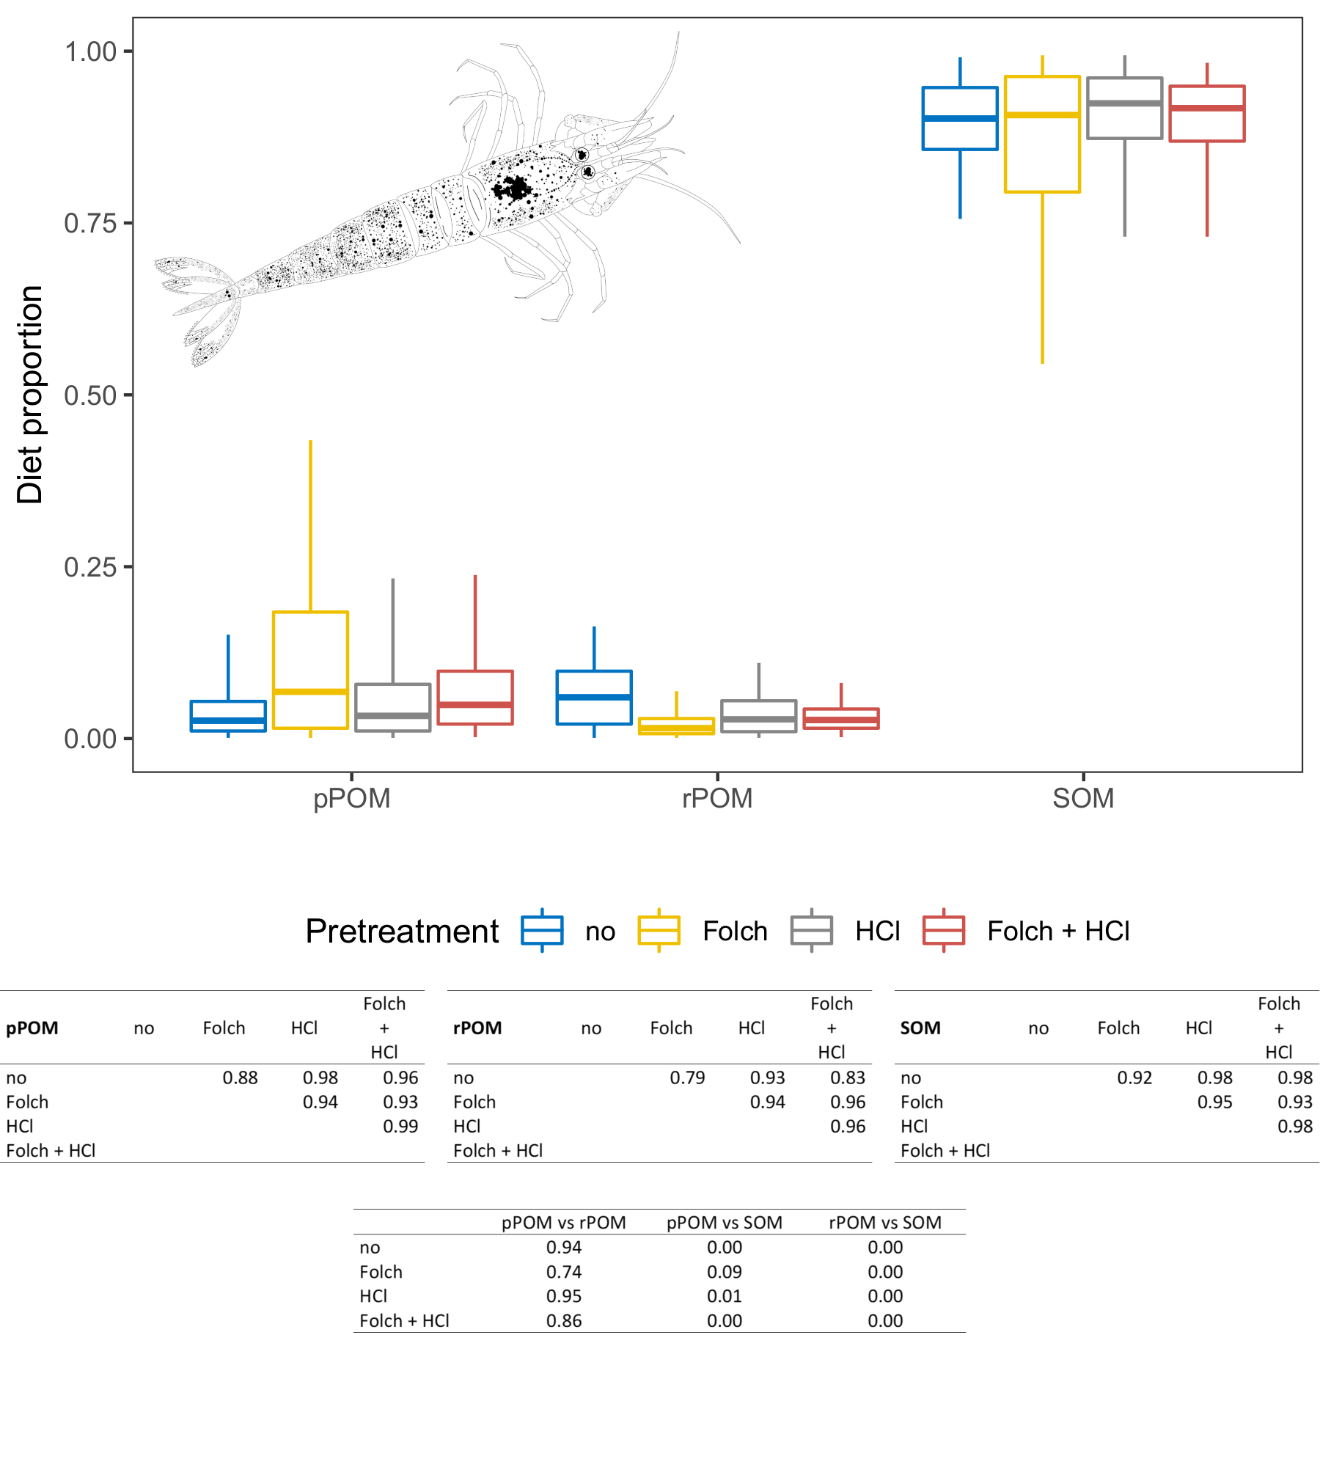


**Supplementary Figure A18.** MixSIAR posterior distribution for *Crangon crangon* (preservation method: formalin; OM source data: A; mathematical correction: Formalin correction according to Vander Zanden et al. (2003)). Colors indicate the applied pre-treatments. Boxplots depict median (horizontal line) with 50% (box) and 95% credible intervals (vertical line). Bhattacharyya’s coefficients for pairwise comparisons among different preservation methods (compare Supplementary Figures 15-17) and between each preservation methods and formalin corrected data are given in the upper and lower matrix, respectively.


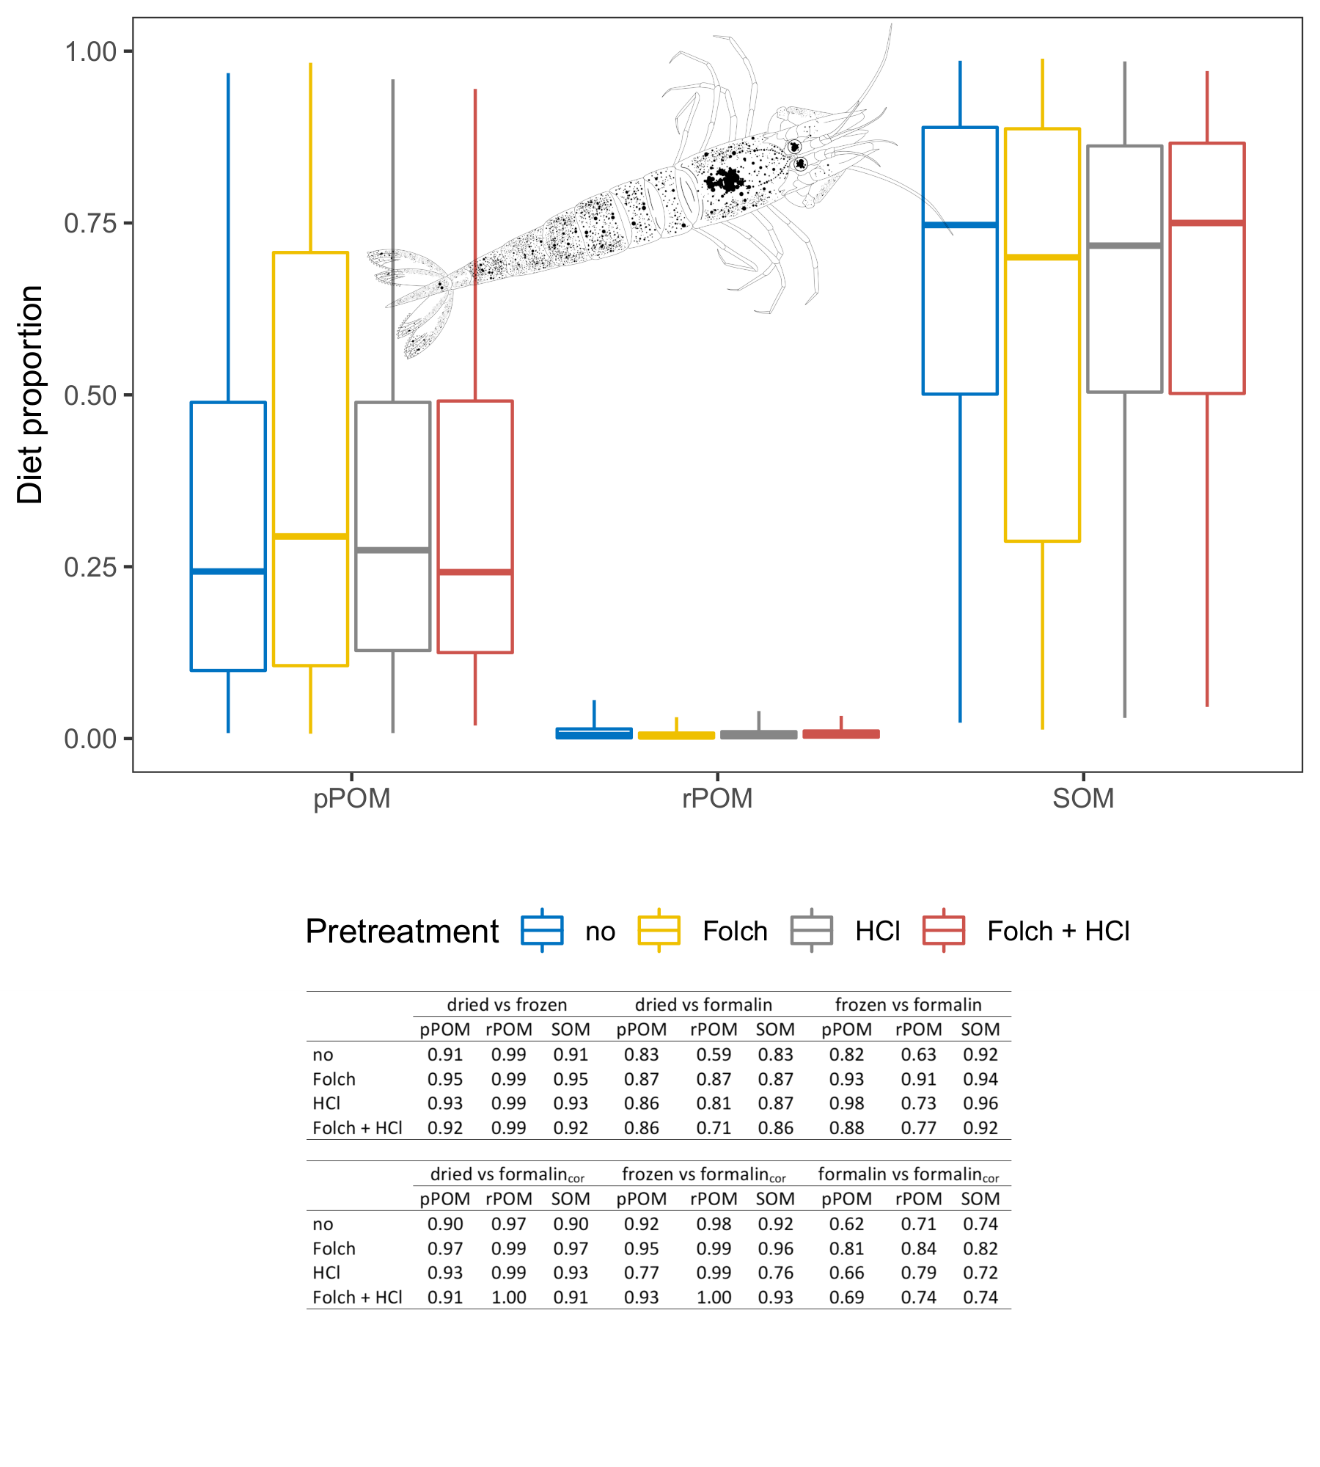


**Supplementary Figure A19.** MixSIAR posterior distribution for *Crangon crangon* (preservation method: dried; OM source data: A; mathematical correction: Lipid normalization according to McConnaughey and McRoy (1979) (*left*) and according to Post et al. (2007) (*right*)). Colors indicate the applied pre-treatments. Boxplots depict median (horizontal line) with 50% (box) and 95% credible intervals (vertical line). Bhattacharyya’s coefficients for pairwise comparisons for each OM source between lipid intact (compare Supplementary Figure 15), lipid removed (compare Supplementary Figure 15), and lipid normalized data are given below each MixSIAR result.


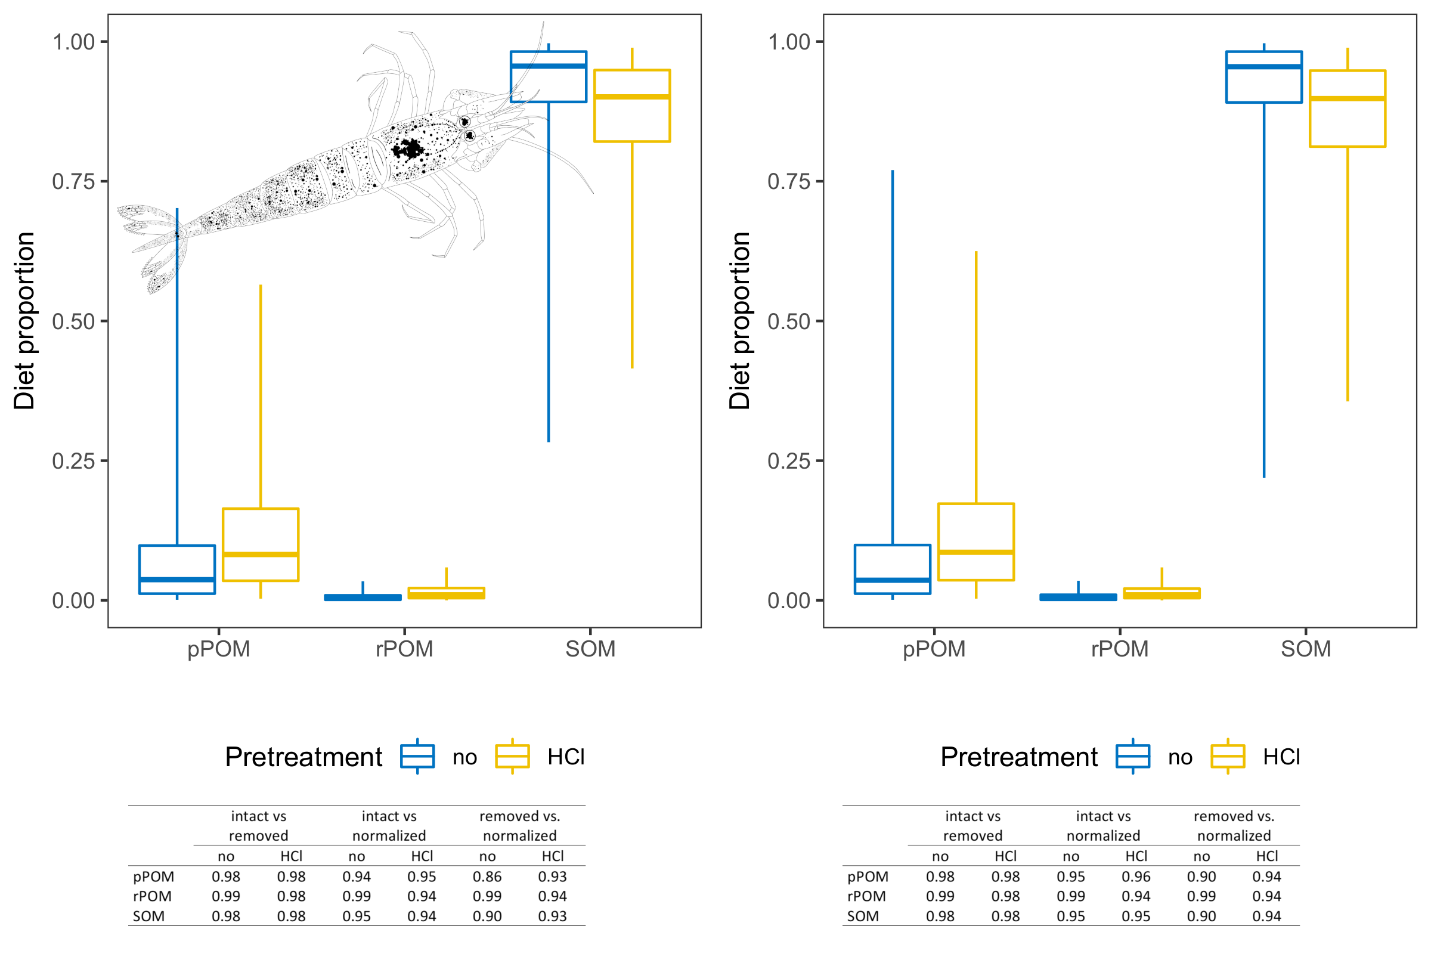


**Supplementary Figure A20.** MixSIAR posterior distribution for *Crangon crangon* (preservation method: frozen; OM source data: A; mathematical correction: Lipid normalization according to McConnaughey and McRoy (1979) (*left*) and according to Post et al. (2007) (*right*)). Colors indicate the applied pre-treatments. Boxplots depict median (horizontal line) with 50% (box) and 95% credible intervals (vertical line). Bhattacharyya’s coefficients for pairwise comparisons for each OM source between lipid intact (compare Supplementary Figure 16), lipid removed (compare Supplementary Figure 16), and lipid normalized data are given below each MixSIAR result.


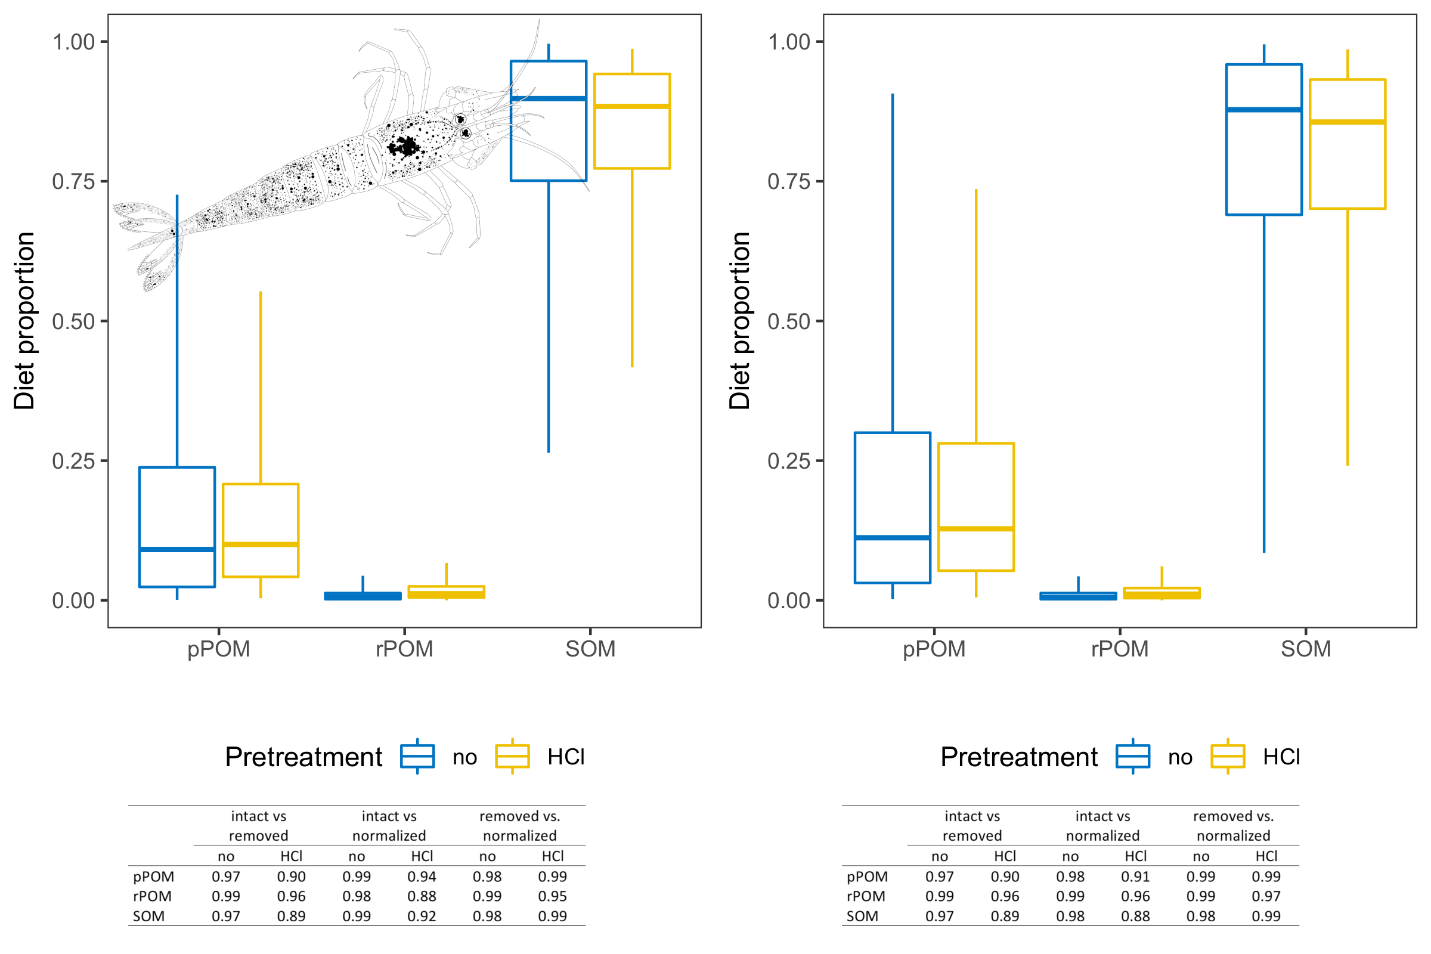


**Supplementary Figure A21.** MixSIAR posterior distribution for *Crangon crangon* (preservation method: formalin; OM source data: A; mathematical correction: Lipid normalization according to McConnaughey and McRoy (1979) (*left*) and according to Post et al. (2007) (*right*)). Colors indicate the applied pre-treatments. Boxplots depict median (horizontal line) with 50% (box) and 95% credible intervals (vertical line). Bhattacharyya’s coefficients for pairwise comparisons for each OM source between lipid intact (compare Supplementary Figure 17), lipid removed (compare Supplementary Figure 17), and lipid normalized data are given below each MixSIAR result.


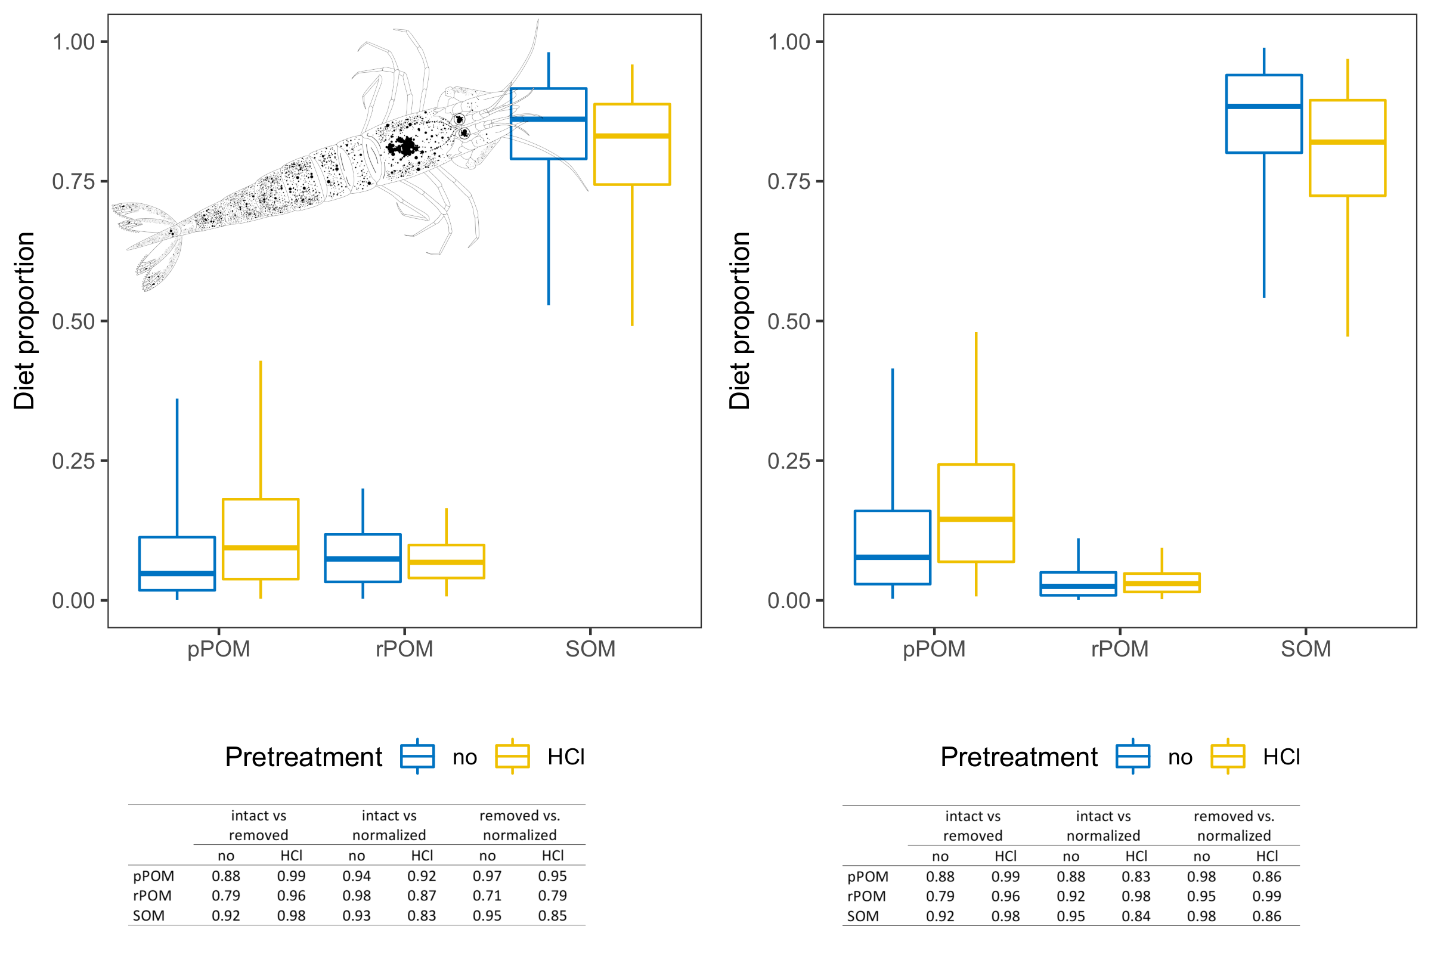


**Supplementary Figure A22.** MixSIAR posterior distribution for *Crangon crangon* (preservation method: dried; OM source data: B; mathematical correction: none). Colors indicate the applied pre-treatments. Boxplots depict median (horizontal line) with 50% (box) and 95% credible intervals (vertical line). Bhattacharyya’s coefficients for pairwise comparisons between pre-treatments are given for each OM source in triangular matrices. Bhattacharyya’s coefficients for pairwise comparisons between OM sources are given for each pre-treatment in the rectangular matrix.


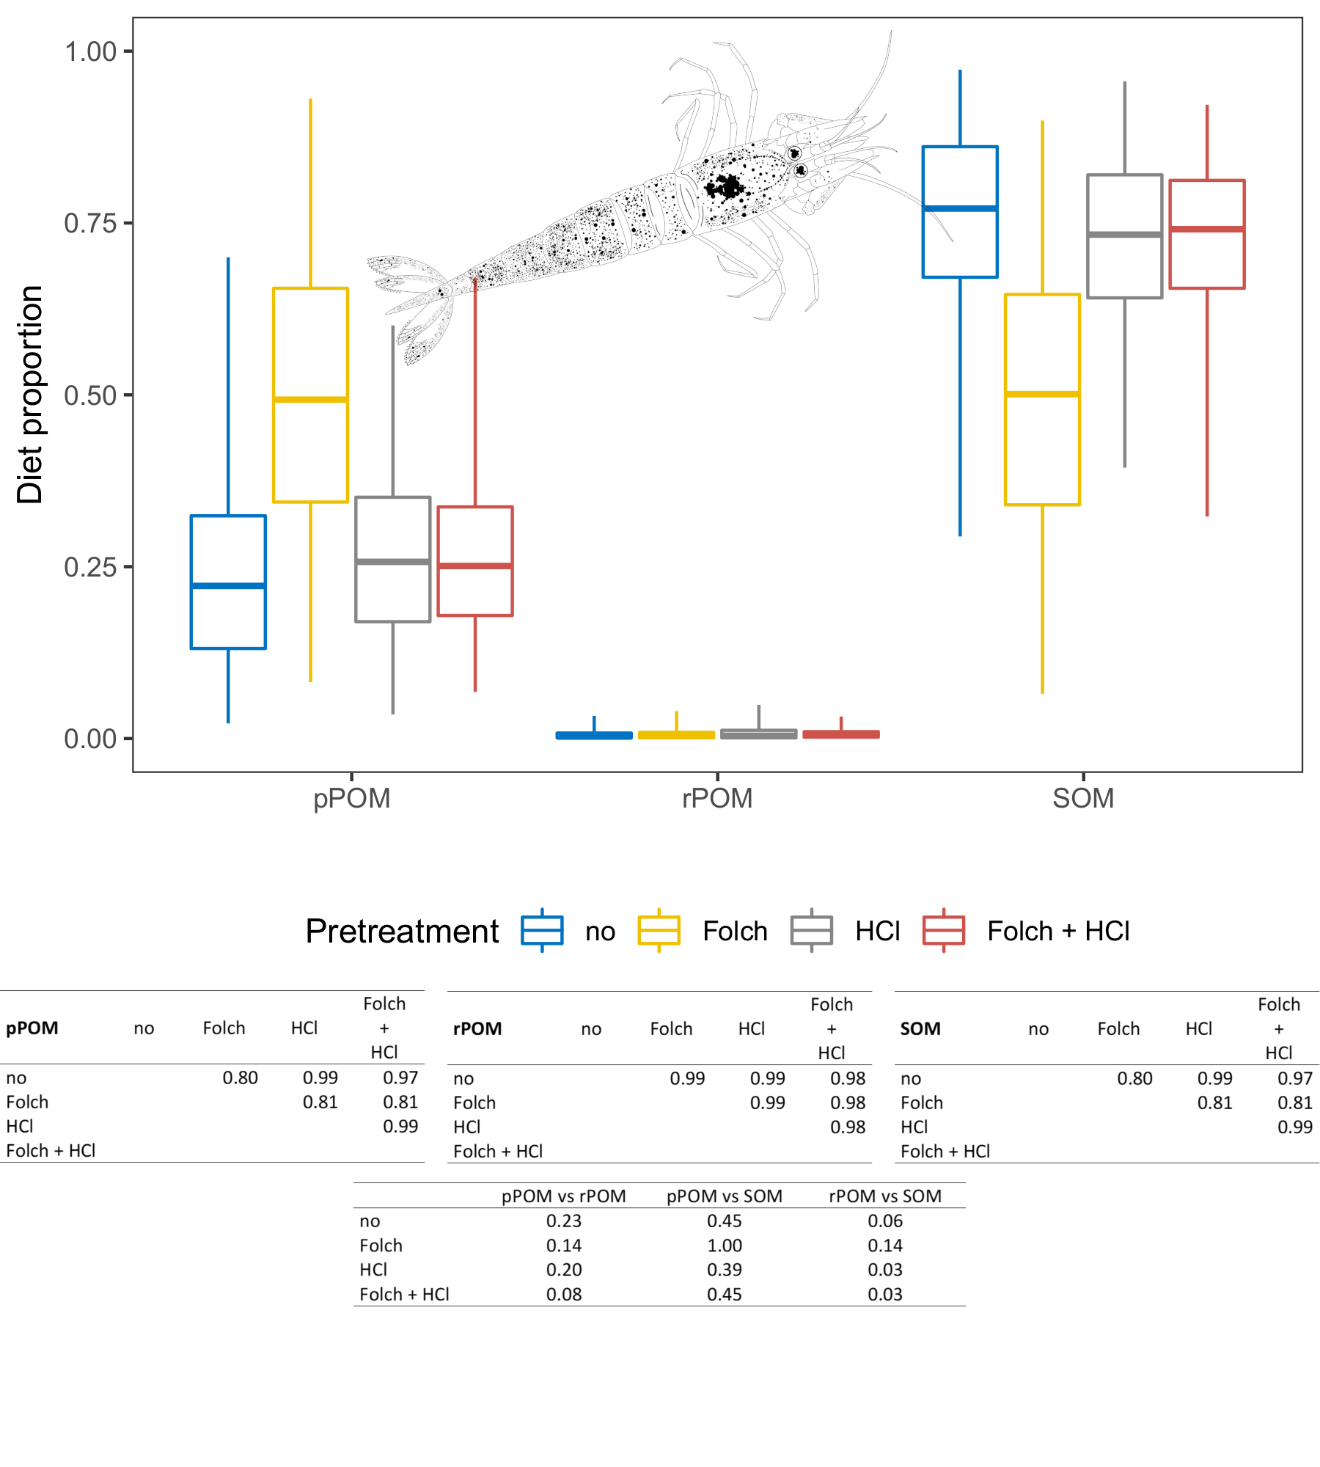


**Supplementary Figure A23.** MixSIAR posterior distribution for *Crangon crangon* (preservation method: frozen; OM source data: B; mathematical correction: none). Colors indicate the applied pre-treatments. Boxplots depict median (horizontal line) with 50% (box) and 95% credible intervals (vertical line). Bhattacharyya’s coefficients for pairwise comparisons between pre-treatments are given for each OM source in triangular matrices. Bhattacharyya’s coefficients for pairwise comparisons between OM sources are given for each pre-treatment in the rectangular matrix.


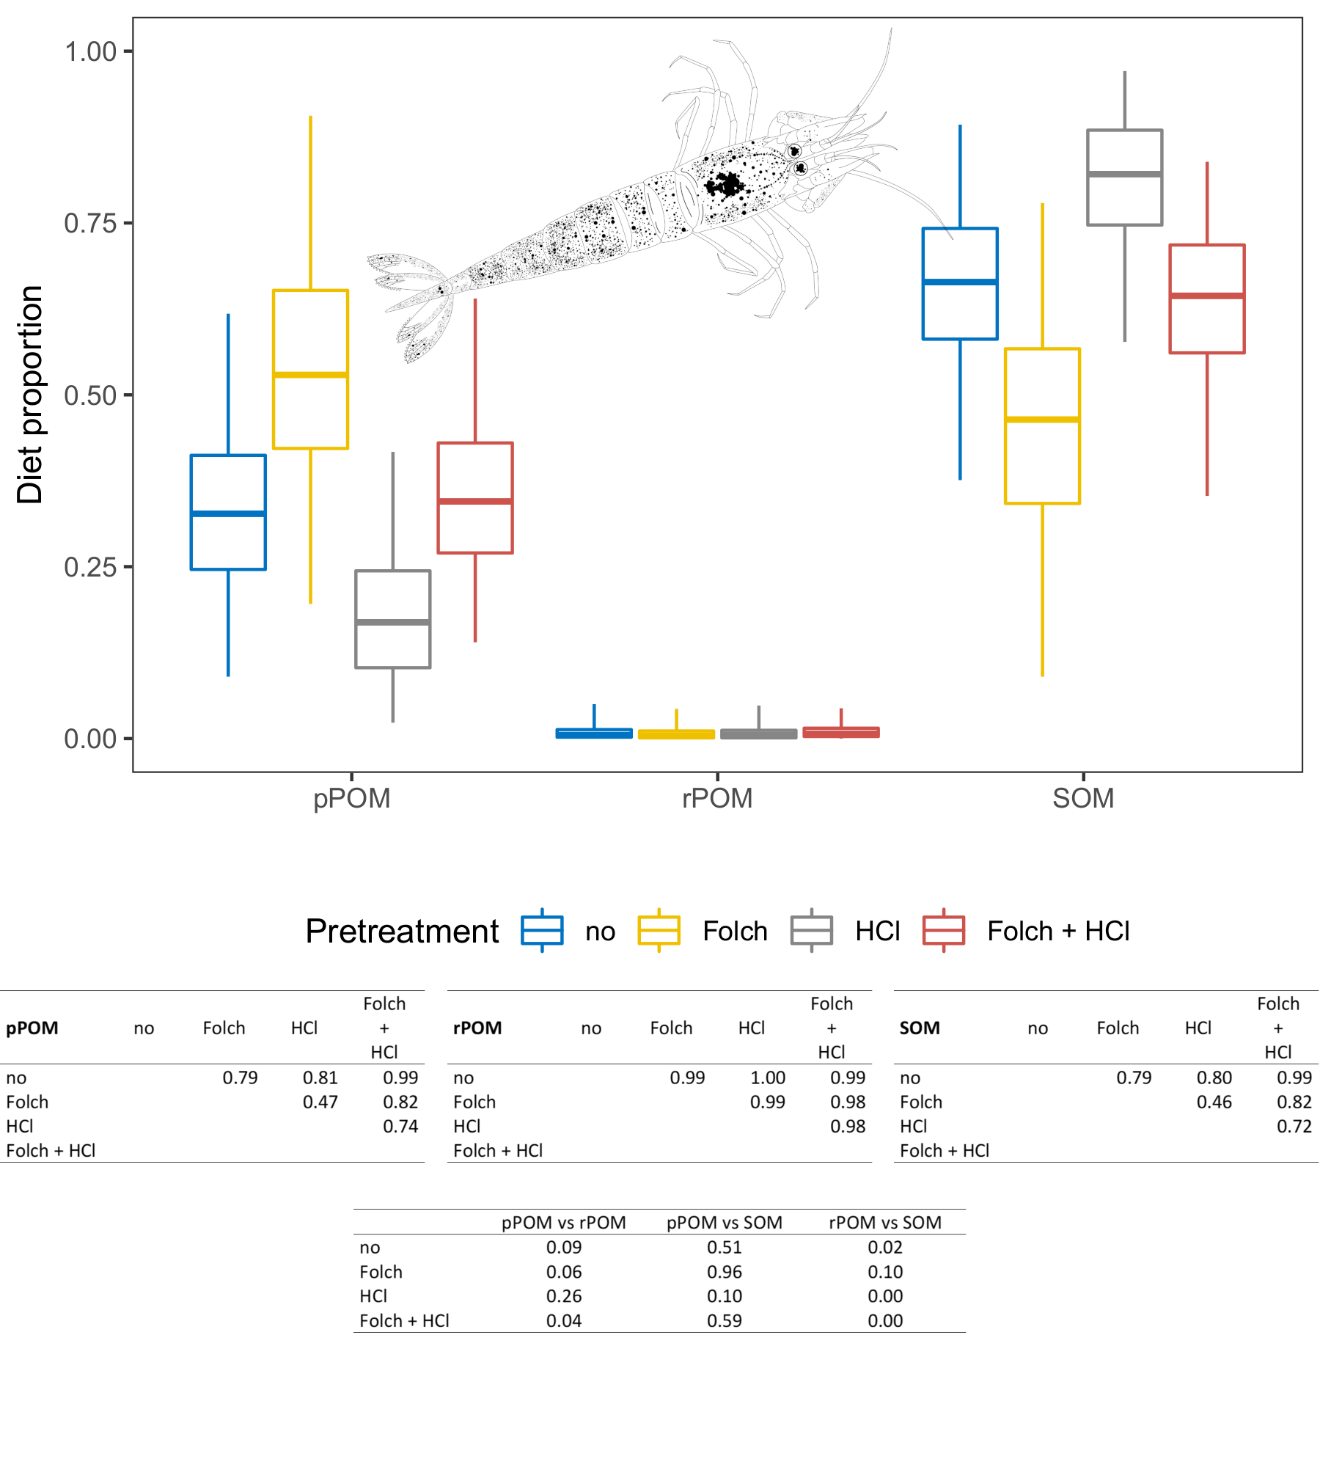


**Supplementary Figure A24.** MixSIAR posterior distribution for *Crangon crangon* (preservation method: formalin; OM source data: B; mathematical correction: none). Colors indicate the applied pre-treatments. Boxplots depict median (horizontal line) with 50% (box) and 95% credible intervals (vertical line). Bhattacharyya’s coefficients for pairwise comparisons between pre-treatments are given for each OM source in triangular matrices. Bhattacharyya’s coefficients for pairwise comparisons between OM sources are given for each pre-treatment in the rectangular matrix.


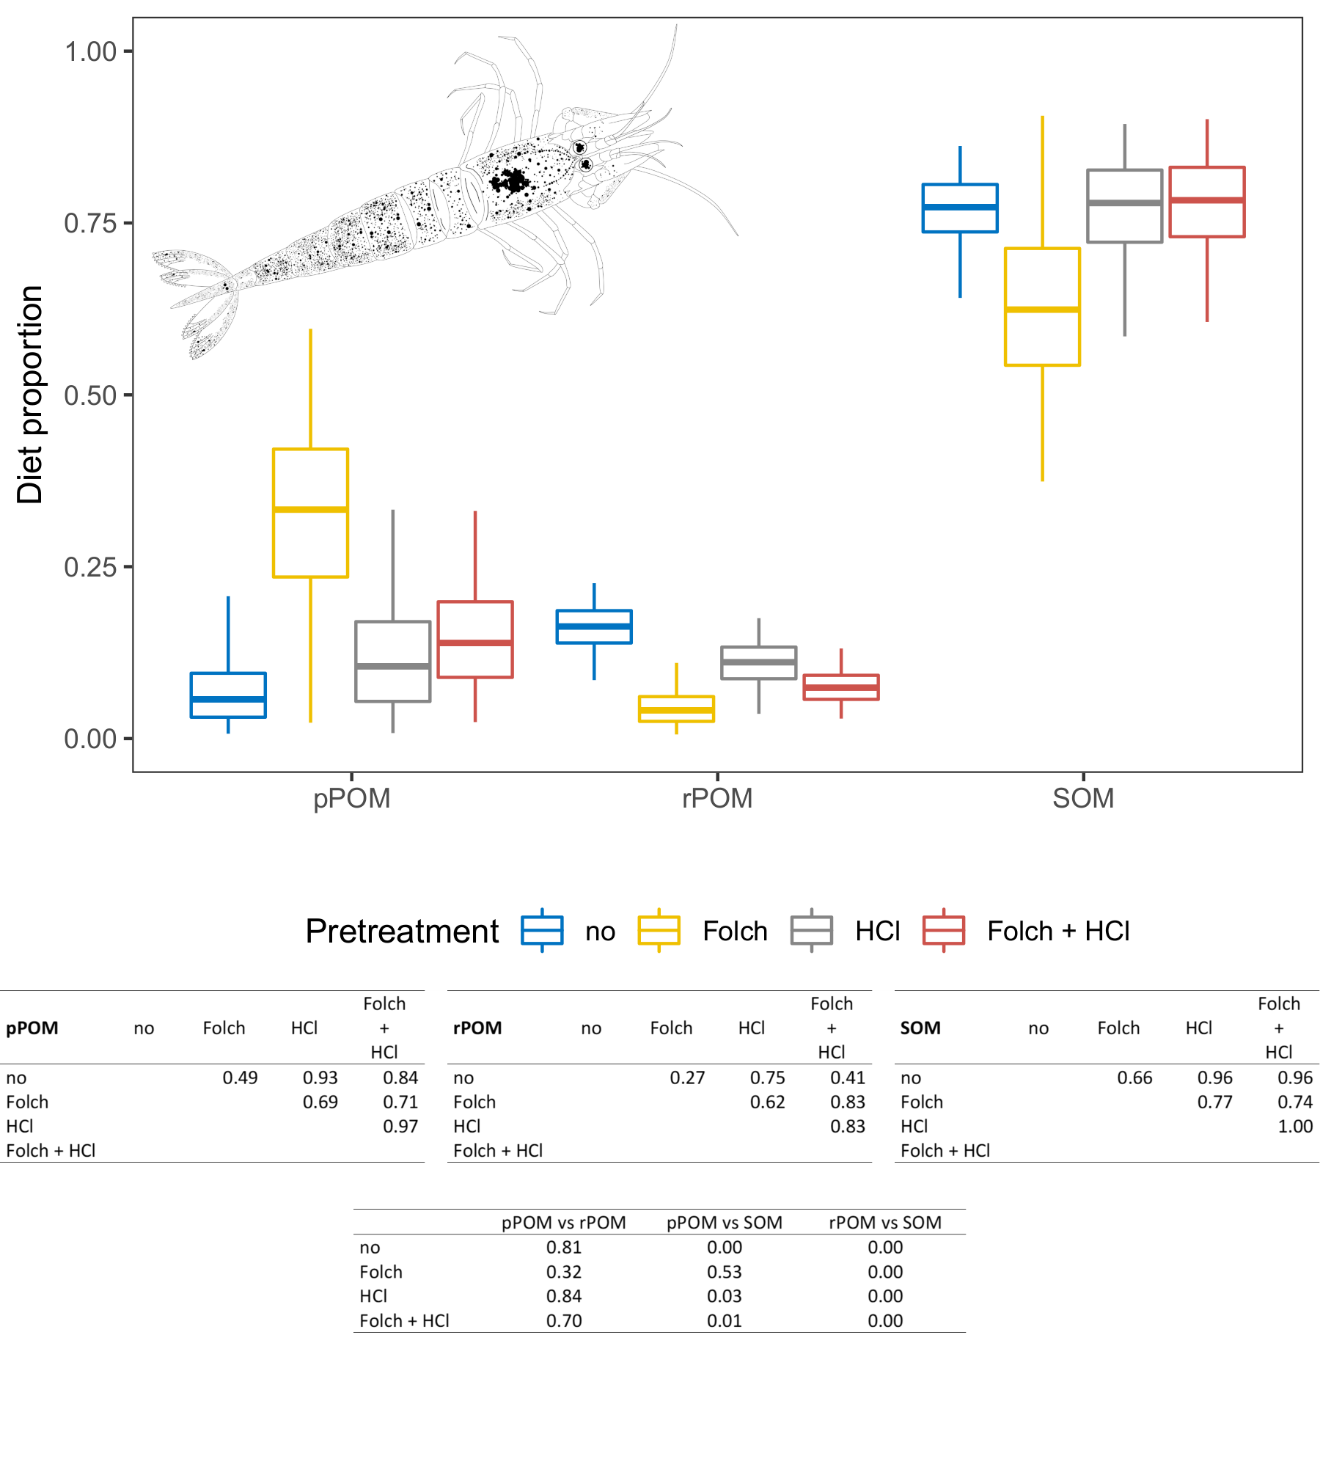


**Supplementary Figure A25.** MixSIAR posterior distribution for *Crangon crangon* (preservation method: formalin; OM source data: B; mathematical correction: Formalin correction according to Vander Zanden et al. (2003)). Colors indicate the applied pre-treatments. Boxplots depict median (horizontal line) with 50% (box) and 95% credible intervals (vertical line). Bhattacharyya’s coefficients for pairwise comparisons among different preservation methods (compare Supplementary Figures 22-24) and between each preservation methods and formalin corrected data are given in the upper and lower matrix, respectively.


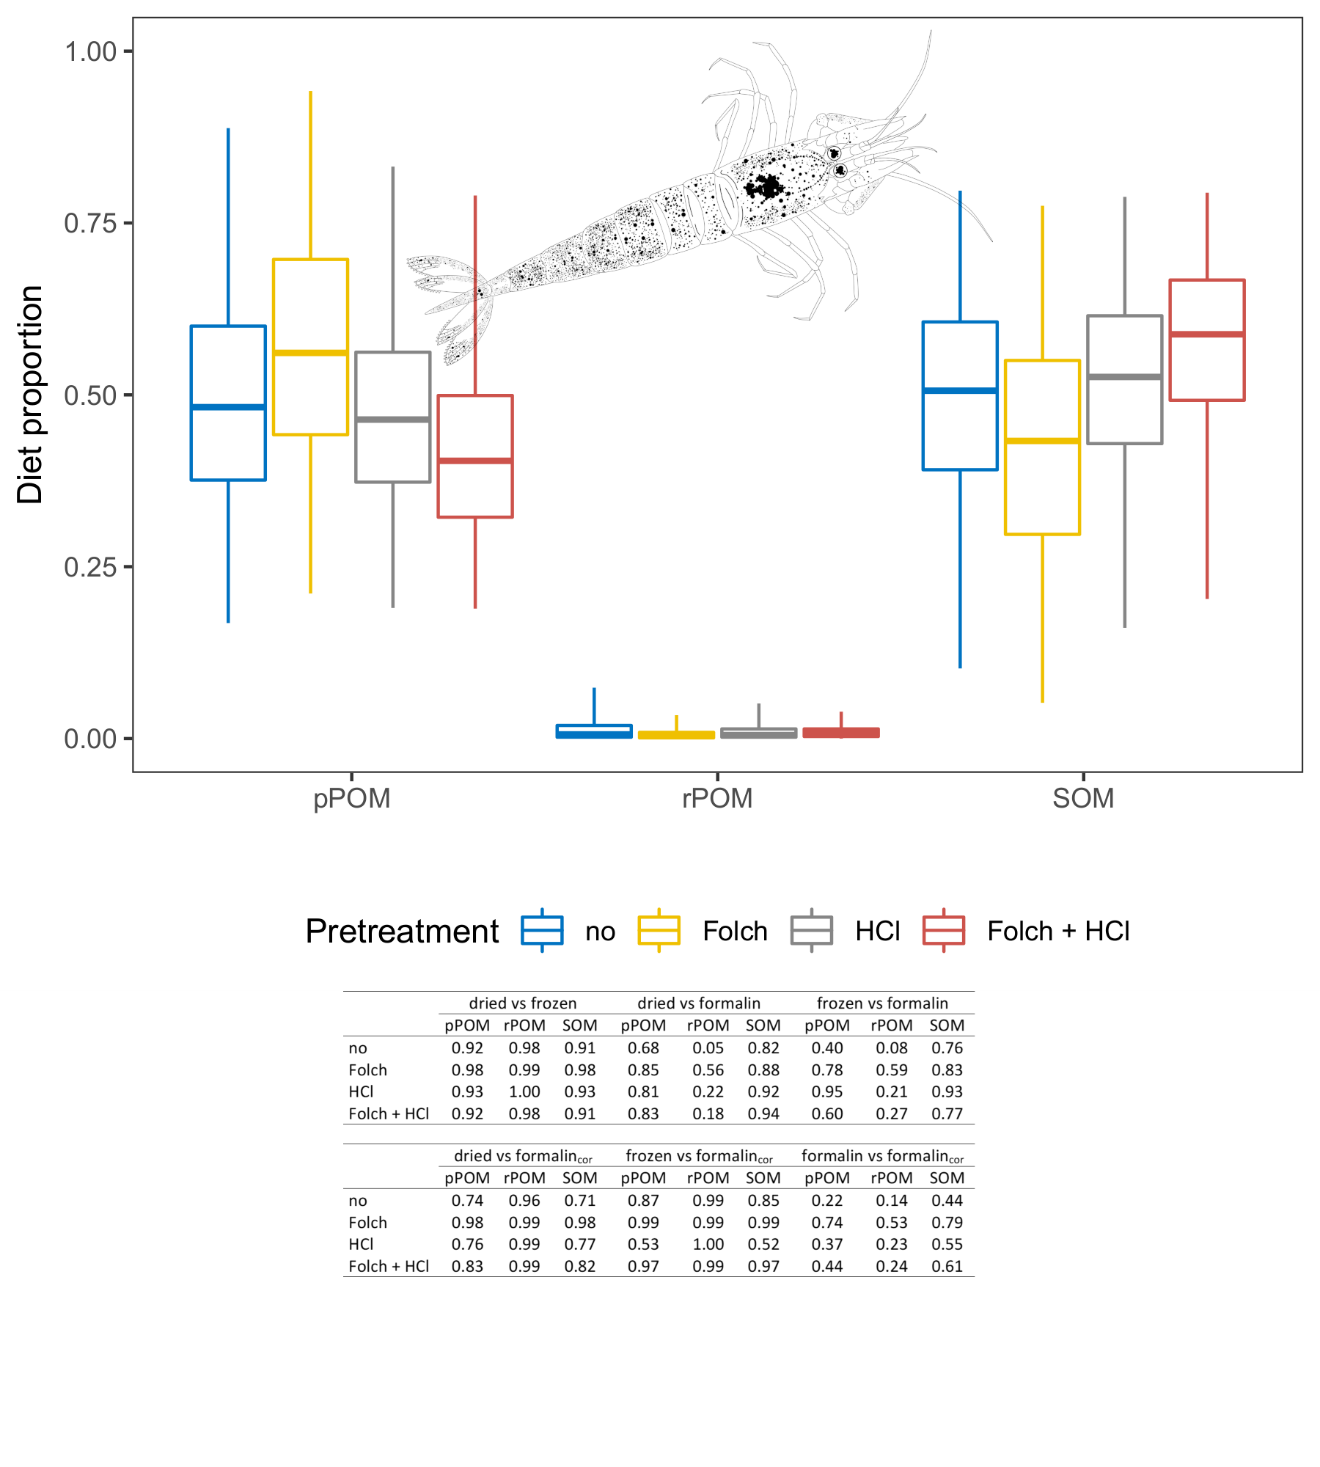


**Supplementary Figure A26.** MixSIAR posterior distribution for *Crangon crangon* (preservation method: dried; OM source data: B; mathematical correction: Lipid normalization according to McConnaughey and McRoy (1979) (*left*) and according to Post et al. (2007) (*right*)). Colors indicate the applied pre-treatments. Boxplots depict median (horizontal line) with 50% (box) and 95% credible intervals (vertical line). Bhattacharyya’s coefficients for pairwise comparisons for each OM source between lipid intact (compare Supplementary Figure 22), lipid removed (compare Supplementary Figure 22), and lipid normalized data are given below each MixSIAR result.


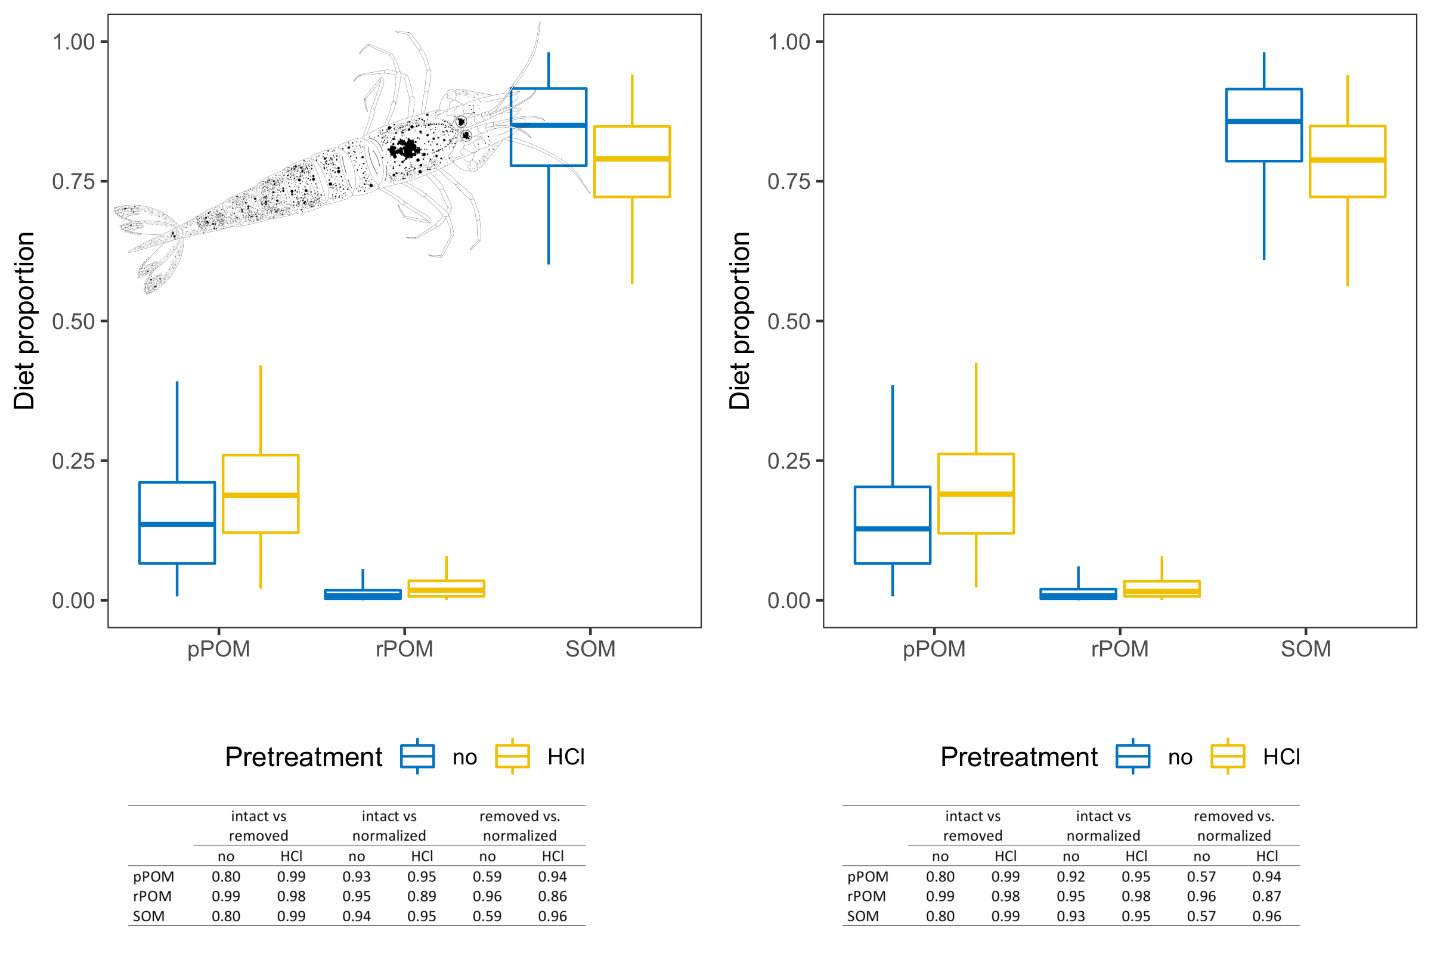


**Supplementary Figure A27.** MixSIAR posterior distribution for *Crangon crangon* (preservation method: frozen; OM source data: B; mathematical correction: Lipid normalization according to McConnaughey and McRoy (1979) (*left*) and according to Post et al. (2007) (*right*)). Colors indicate the applied pre-treatments. Boxplots depict median (horizontal line) with 50% (box) and 95% credible intervals (vertical line). Bhattacharyya’s coefficients for pairwise comparisons for each OM source between lipid intact (compare Supplementary Figure 23), lipid removed (compare Supplementary Figure 23), and lipid normalized data are given below each MixSIAR result.


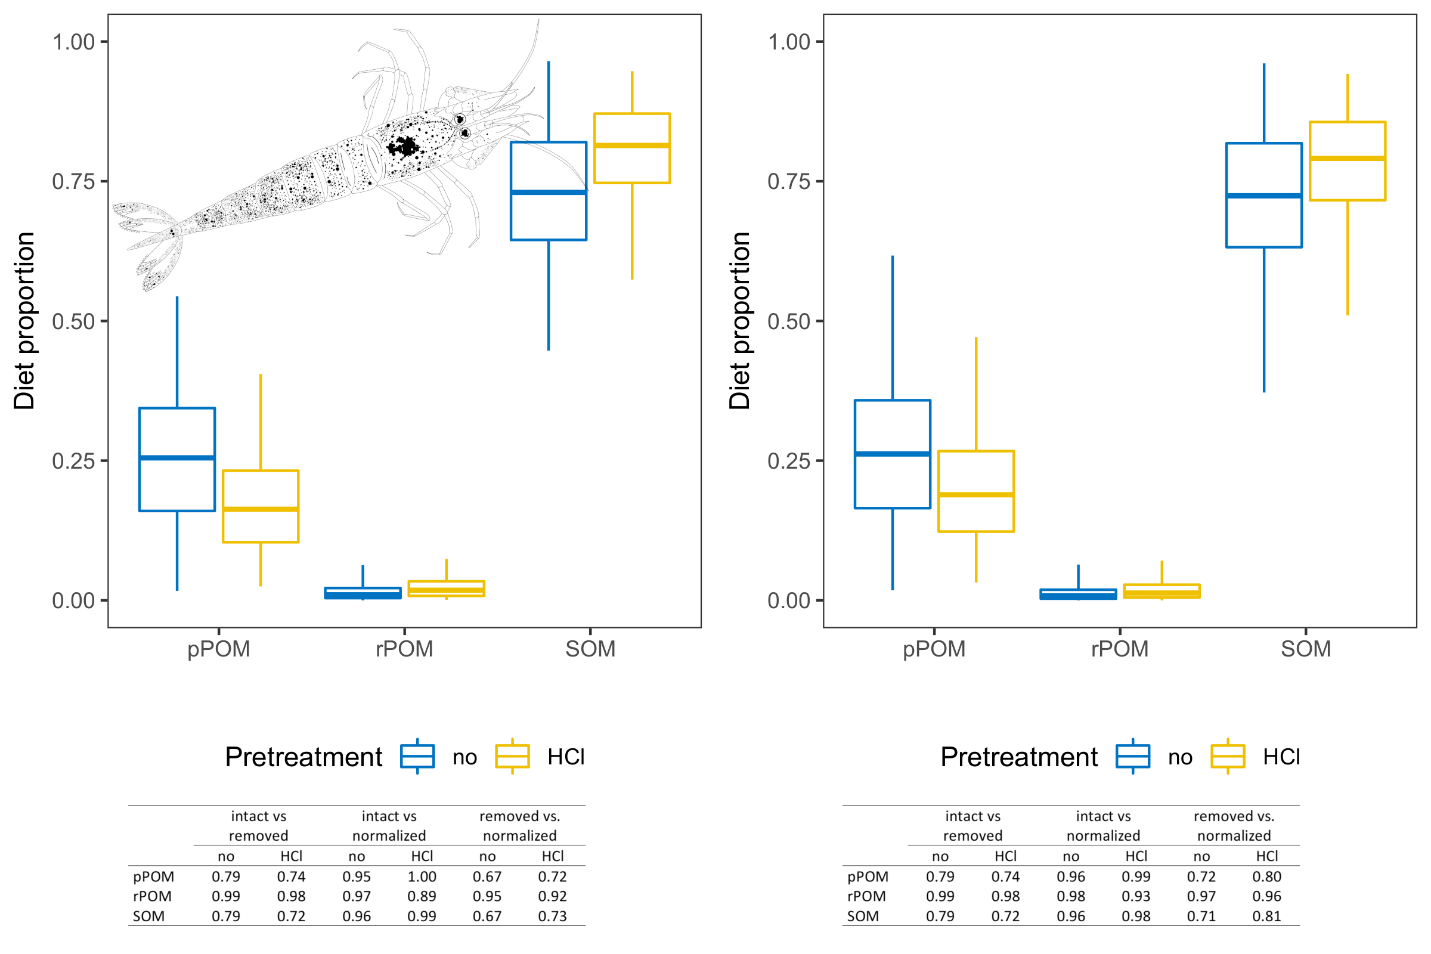


**Supplementary Figure A28.** MixSIAR posterior distribution for *Crangon crangon* (preservation method: formalin; OM source data: B; mathematical correction: Lipid normalization according to McConnaughey and McRoy (1979) (*left*) and according to Post et al. (2007) (*right*)). Colors indicate the applied pre-treatments. Boxplots depict median (horizontal line) with 50% (box) and 95% credible intervals (vertical line). Bhattacharyya’s coefficients for pairwise comparisons for each OM source between lipid intact (compare Supplementary Figure 24), lipid removed (compare Supplementary Figure 24), and lipid normalized data are given below each MixSIAR result.


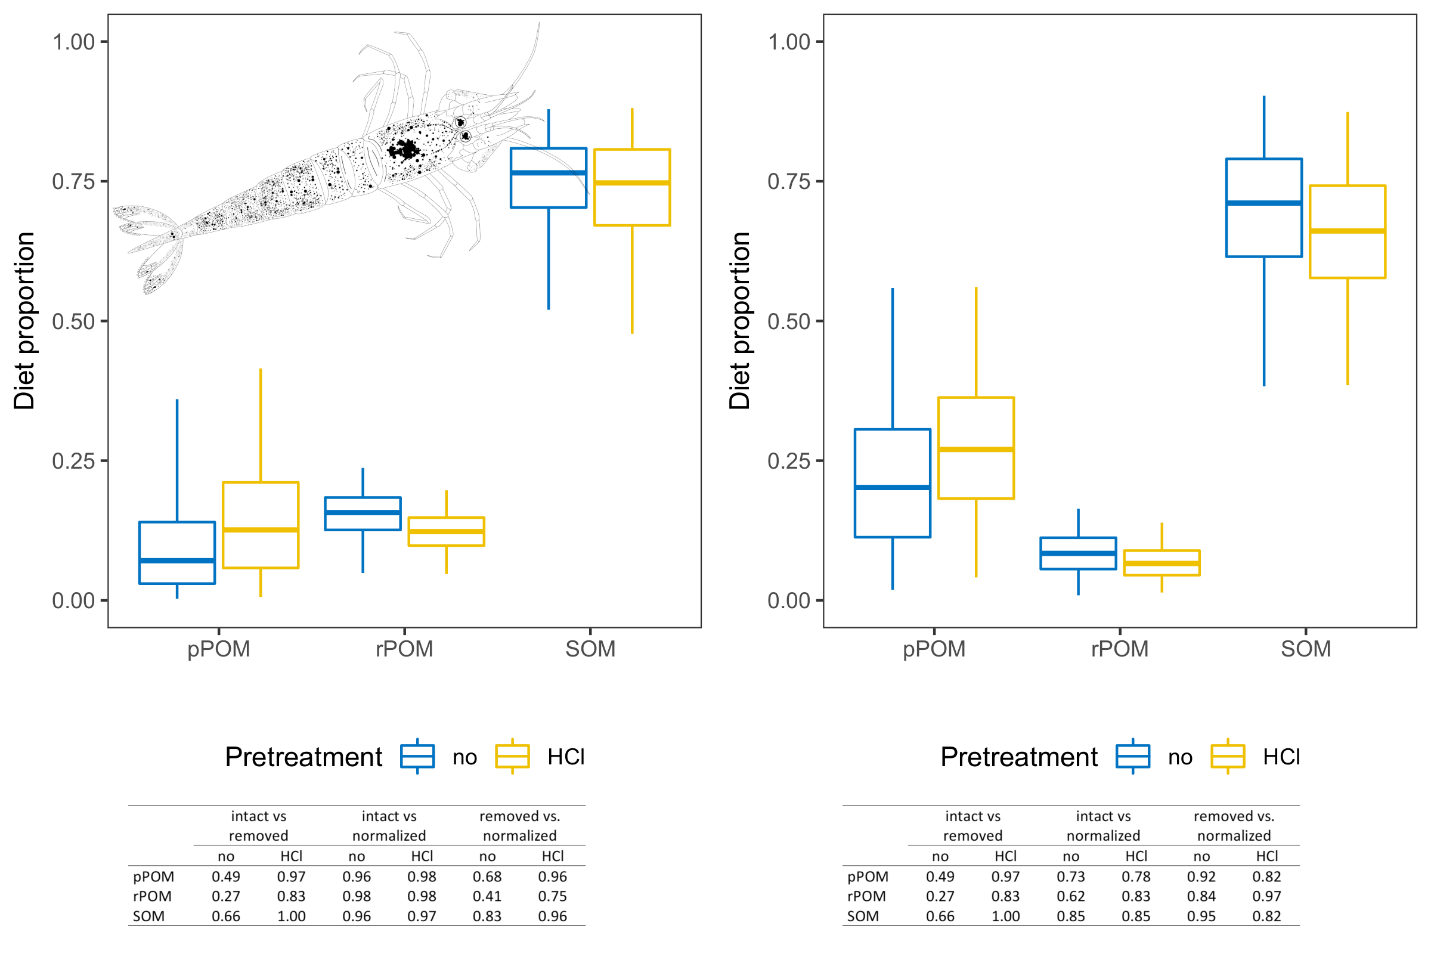


**Supplementary Table A29.** Pairwise comparison between MixSIAR posterior distributions of models that used OM source data A and models that used OM source data B. Bhattacharyya coefficients (BCs) for all pairwise comparisons are reported.

|  |  | pPOM | | | | rPOM | | | | SOM | | | |
| --- | --- | --- | --- | --- | --- | --- | --- | --- | --- | --- | --- | --- | --- |
|  |  | no | Folch | HCl | Folch  +  HCl | no | Folch | HCl | Folch  +  HCl | no | Folch | HCl | Folch  +  HCl |
| ***Limecola balthica*** | |  |  |  |  |  |  |  |  |  |  |  |  |
|  | dried | 0.97 | 1.00 | 0.97 | 0.88 | 0.99 | 1.00 | 0.98 | 0.96 | 0.97 | 0.99 | 0.95 | 0.87 |
|  | frozen | 0.91 | 0.94 | 0.93 | 0.93 | 0.86 | 0.92 | 0.92 | 0.95 | 0.84 | 0.90 | 0.89 | 0.91 |
|  | formalin | 0.90 | 0.90 | 0.83 | 0.86 | 0.57 | 0.93 | 0.88 | 0.93 | 0.60 | 0.82 | 0.69 | 0.76 |
| Formalin corrected | |  |  |  |  |  |  |  |  |  |  |  |  |
|  | formalin | 0.73 | 0.98 | 0.97 | 0.96 | 0.92 | 0.99 | 0.99 | 0.98 | 0.63 | 0.97 | 0.96 | 0.93 |
| Lipid corrected (McConnaughey & McRoy 1979) | | | | | | | | | | | | | |
|  | dried | 0.99 | na | 0.98 | na | 1.00 | na | 0.99 | na | 0.99 | na | 0.97 | na |
|  | frozen | 0.98 | na | 0.97 | na | 0.99 | na | 0.98 | na | 0.98 | na | 0.96 | na |
|  | formalin | 0.93 | na | 0.95 | na | 0.91 | na | 0.96 | na | 0.84 | na | 0.88 | na |
| Lipid corrected (Post et al. 2007) | | | | | | | | | | | | | |
|  | dried | 0.99 | na | 0.99 | na | 1.00 | na | 1.00 | na | 0.99 | na | 0.98 | na |
|  | frozen | 0.99 | na | 0.98 | na | 1.00 | na | 1.00 | na | 0.98 | na | 0.97 | na |
|  | formalin | 0.92 | na | 0.97 | na | 0.99 | na | 0.99 | na | 0.89 | na | 0.94 | na |
|  |  |  |  |  |  |  |  |  |  |  |  |  |  |
| ***Crangon crangon*** | |  |  |  |  |  |  |  |  |  |  |  |  |
|  | dried | 0.78 | 0.75 | 0.79 | 0.72 | 0.99 | 0.99 | 1.00 | 1.00 | 0.77 | 0.75 | 0.78 | 0.71 |
|  | frozen | 0.73 | 0.69 | 0.78 | 0.70 | 0.99 | 0.99 | 0.98 | 0.99 | 0.71 | 0.68 | 0.77 | 0.68 |
|  | formalin | 0.92 | 0.76 | 0.88 | 0.83 | 0.54 | 0.84 | 0.58 | 0.63 | 0.53 | 0.68 | 0.60 | 0.63 |
| Formalin corrected | |  |  |  |  |  |  |  |  |  |  |  |  |
|  | formalin | 0.79 | 0.78 | 0.81 | 0.77 | 0.99 | 0.99 | 0.99 | 0.99 | 0.77 | 0.78 | 0.80 | 0.76 |
| Lipid corrected (McConnaughey & McRoy 1979) | | | | | | | | | | | | | |
|  | dried | 0.86 | na | 0.87 | na | 0.96 | na | 0.97 | na | 0.83 | na | 0.83 | na |
|  | frozen | 0.86 | na | 0.92 | na | 0.97 | na | 0.98 | na | 0.84 | na | 0.89 | na |
|  | formalin | 0.99 | na | 0.99 | na | 0.78 | na | 0.81 | na | 0.80 | na | 0.88 | na |
| Lipid corrected (Post et al. 2007) | | | | | | | | | | | | | |
|  | dried | 0.86 | na | 0.88 | na | 0.96 | na | 0.97 | na | 0.83 | na | 0.83 | na |
|  | frozen | 0.87 | na | 0.91 | na | 0.98 | na | 0.99 | na | 0.85 | na | 0.89 | na |
|  | formalin | 0.89 | na | 0.91 | na | 0.79 | na | 0.83 | na | 0.76 | na | 0.83 | na |
